1     **Molecular basis of SARS-CoV-2 Omicron variant receptor engagement**  
2                     **and antibody evasion and neutralization**

3

4     Qin Hong<sup>1,2,#</sup>, Wenyu Han<sup>1,2,#</sup>, Jiawei Li<sup>1,2,#</sup>, Shiqi Xu<sup>3,#</sup>, Yifan Wang<sup>1,2,#</sup>, Zuyang Li<sup>1,2</sup>,  
5             Yanxing Wang<sup>1,\*</sup>, Chao Zhang<sup>3,\*</sup>, Zhong Huang<sup>3,\*</sup>, Yao Cong<sup>1,2,\*</sup>

6

7     <sup>1</sup> State Key Laboratory of Molecular Biology, National Center for Protein Science Shanghai,  
8     Shanghai Institute of Biochemistry and Cell Biology, Center for Excellence in Molecular Cell  
9     Science, Chinese Academy of Sciences, Shanghai 200031, China.

10    <sup>2</sup> University of Chinese Academy of Sciences, Beijing 100049, China.

11    <sup>3</sup> CAS Key Laboratory of Molecular Virology and Immunology, Institut Pasteur of Shanghai,  
12    Chinese Academy of Sciences, University of Chinese Academy of Sciences, Shanghai 200031,  
13    China.

14

15    # These authors contributed equally to this work.

16    \*To whom correspondence may be addressed. Email: [cong@sibcb.ac.cn](mailto:cong@sibcb.ac.cn),  
17    [huangzhong@ips.ac.cn](mailto:huangzhong@ips.ac.cn), [chaozhang@ips.ac.cn](mailto:chaozhang@ips.ac.cn), [yxwang@sibcb.ac.cn](mailto:yxwang@sibcb.ac.cn)

18

19 **Abstract**

20 The SARS-CoV-2 Omicron variant exhibits striking immune evasion and is spreading  
21 globally at an unprecedented speed. Understanding the underlying structural basis of the high  
22 transmissibility and greatly enhanced immune evasion of Omicron is of high importance. Here  
23 through cryo-EM analysis, we present both the closed and open states of the Omicron spike,  
24 which appear more compact than the counterparts of the G614 strain, potentially related to the  
25 Omicron substitution induced enhanced protomer-protomer and S1-S2 interactions. The closed  
26 state showing dominant population may indicate a conformational masking mechanism of  
27 immune evasion for Omicron spike. Moreover, we capture two states for the Omicron S/ACE2  
28 complex with S binding one or two ACE2s, revealing that the substitutions on the Omicron  
29 RBM result in new salt bridges/H-bonds and more favorable electrostatic surface properties,  
30 together strengthened interaction with ACE2, in line with the higher ACE2 affinity of the  
31 Omicron relative to the G614 strain. Furthermore, we determine cryo-EM structures of the  
32 Omicron S/S3H3 Fab, an antibody able to cross-neutralize major variants of concern including  
33 Omicron, elucidating the structural basis for S3H3-mediated broad-spectrum neutralization.  
34 Our findings shed new lights on the high transmissibility and immune evasion of the Omicron  
35 variant and may also inform design of broadly effective vaccines against emerging variants.

36

## 37 Introduction

38 Severe acute respiratory syndrome coronavirus 2 (SARS-CoV-2) has undergone  
39 considerable evolution since its initial discovery in December 2019, leading to the emergence  
40 of a number of variants of concerns (VOCs) including Alpha (B.1.1.7)<sup>1-5</sup>, Beta (B.1.351)<sup>4-8</sup>,  
41 Gamma (P1)<sup>9</sup>, and Delta (B.1.617.2)<sup>10,11</sup>. These variants that harbor multiple mutations on their  
42 spike (S) protein show enhanced transmissibility and resistance to antibody neutralization<sup>11</sup>.  
43 Recently, a new variant, named Omicron (B.1.1.529), was first reported in South Africa in  
44 November 2021 and classified as the fifth VOC by the World Health Organization (WHO) on  
45 26 November 2021. Omicron exhibits a high transmission rate ( $R_0 > 3$ )<sup>12,13</sup>, and, as of 22  
46 December 2021, it has spread into 110 countries<sup>14</sup>.

47 Omicron bears 37 mutations in its S protein relative to the original SARS-CoV-2 strain<sup>15,16</sup>.  
48 As the consequence, Omicron has been observed to extensively escape neutralization by  
49 previously developed neutralizing monoclonal antibodies (MAbs) or sera from vaccines or  
50 convalescent individuals<sup>15,17-22</sup>. Among all of the Omicron S mutations, 15 are present in the  
51 receptor-binding domain (RBD) that mediates the virus binding to its host-cell receptor—  
52 angiotensin-converting enzyme 2 (ACE2) and is also a major target for neutralizing  
53 antibodies<sup>23-27</sup>. In particular, 9 mutations are located within the receptor-binding motif (RBM)  
54 interacting directly with ACE2. However, Omicron still uses ACE2 as its entry receptor<sup>22</sup>.  
55 Moreover, the Omicron S appears to have an increased binding affinity to human ACE2  
56 relative to the WT S<sup>15,16,28</sup>.

57 The high transmissibility and greatly enhanced resistance to antibody neutralization  
58 observed for Omicron makes this VOC particularly threatening. Therefore, further  
59 understanding of the nature of Omicron is of significant importance and may help in developing  
60 countermeasures against this VOC. The present study aimed to address from a structural aspect  
61 how Omicron binds the ACE2 receptor and how it recognizes or evades neutralizing antibodies  
62 raised against the original virus. We captured two cryo-EM structures of the Omicron S trimer  
63 in the closed and open state at 3.08- and 3.21-Å-resolution, respectively, revealing the Omicron  
64 spike is structurally more compact compared to the counterparts of the G614 strain. This could  
65 be related to the unique Omicron substitutions in SD1 and S2 regions. We also obtained two  
66 states of the Omicron S/ACE2 complex with S binding one or two ACE2s, respectively,  
67 suggesting that the substitutions on the RBM of Omicron result in formation of new salt bridges  
68 and H-bonds, as well as more complementary electrostatic surface properties. Moreover, we  
69 determined cryo-EM structures of the Omicron S in complex with the Fab of S3H3<sup>29</sup>, an

70 antibody able to cross-neutralize major VOCs including Omicron, thus allowing elucidation of  
71 the structural basis for S3H3-mediated broad-spectrum neutralization.

## 72 **Results**

### 73 **Closed and open state structures of the Omicron S trimer**

74 To inspect the impact of the Omicron intense substitutions on the spike conformation, we  
75 prepared a prefusion-stabilized trimeric S protein of SARS-CoV-2 Omicron variant (Fig. S1)  
76 and subsequently determined its cryo-EM structures. Two cryo-EM maps, including an all  
77 RBD down conformation (termed Omicron S-close) and a one RBD-up open conformation  
78 (termed Omicron S-open), were obtained at 3.08- and 3.21-Å-resolution, respectively (Fig. 1A-  
79 B and Fig. S2A-C, Table S1). We then built an atomic model for each of the two structures  
80 (Fig. 1C, S2D). For the Omicron S-close state, the three protomers are well resolved and they  
81 display similar conformation with their RBDs in the down position (Fig. S2C and Fig. 1E).  
82 Strikingly, the Omicron S-close appears more twisted/compact in the RBDs relative to the  
83 G614 S-close structure (Fig. 1F)<sup>30</sup>. Also, in the Omicron S-open state, structural comparison  
84 showed that the RBDs are slightly more twisted/compact than that of the G614 S-open<sup>30</sup> (Fig.  
85 1G). There is no linoleic acid (termed LA) in the Omicron S-open and S-close maps, as in our  
86 recent Delta, Kappa, and Beta S structures obtained in the same construction and purification  
87 condition<sup>31,32</sup>. LA binding has been detected in the tightly closed WT S trimer structures<sup>33-36</sup>,  
88 and been suggested to lead to more compacted RBDs<sup>33</sup>. Collectively, the Omicron S trimer is  
89 more compact than that of G614, and this is not caused by LA binding. Moreover, in the  
90 Omicron S-open structure, the down RBD-3 is relative dynamic and less well resolved than  
91 RBD-2 (Fig. 1B). Our further 3D variability analysis (3DVA)<sup>37</sup> on the Omicron S trimer dataset  
92 revealed an intrinsic rising up motion of RBD-1, which could alter the original RBD-1/-3  
93 contact and destabilize RBD-3, making it extremely dynamic and may transiently rise up (Fig  
94 1H, Movie S1).

95 Noteworthy, the population distribution of the Omicron S-close and S-open is about 61%  
96 and 39% (Fig. 1D), respectively, displaying a considerable population distribution shift to the  
97 closed state than that of the Kappa and Beta variants S trimer (both around 50%-50% open-  
98 transition ratio) or that of the Delta S (75.3%-24.7% open-transition ratio) from our recent  
99 studies<sup>31,32</sup>. Taken together, the Omicron S trimer appears more prone to the closed state and  
100 potentially stabilized relative to the counterparts of the G614, Kappa, Beta, and Delta variants.  
101 To investigate the underlying molecular basis of this extra stability, we inspected the protomer

102 interaction interface of Omicron S-close (Table S2, S3) and found three sets of new hydrogen  
103 bond (H-bond) and salt bridge interactions induced by the unique Omicron substitutions  
104 beyond the NTD/RBD regions (Fig. 1I). Specifically, the T547K from the SD1 of protomer 1  
105 forms a new H-bond with the N978 from S2 of protomer 3, which could enhance the S1-S2  
106 subunits interaction between the two protomers; the N856K and N764K from protomer 1 can  
107 form H-bonds with T572 and Q314 from protomer 2, respectively. We also observed multiple  
108 new H-bonds and salt bridges formed between the N317/R319 of protomer 1 and the D737 of  
109 protomer 3. These extra interactions mainly induced by Omicron substitutions in SD1 and S2  
110 contribute greatly to the linkage/allosteric network between neighboring protomers and  
111 between the S1 and S2 subunits, markedly stabilizing the Omicron S trimer and inhibiting its  
112 transformation towards the fusion-prone open state and subsequent shielding of S1.

### 113 **Structural basis of enhanced S-ACE2 interaction for the Omicron variant**

114 Compared with the WT strain, the Omicron variant bears 15 mutations in the RBD region,  
115 9 of which are located in RBM<sup>15</sup>. We assessed whether these mutations affect the human ACE2  
116 receptor-binding ability of the Omicron S trimer by performing biolayer interferometry (BLI)  
117 assay. The S trimers of the G614 and Delta variant were also analyzed for comparison purpose.  
118 We found that the ACE2-binding affinity of the Omicron S trimer (KD = 80 nM) is comparable  
119 to that of the Delta S (KD = 88 nM) but is about 3 folds higher than that of the G614 S (KD =  
120 237 nM) (Fig. 2A), in consistence with the data from other recent preprints<sup>15,16,28</sup>.

121 Next, we carried out cryo-EM study on the Omicron S trimer in complex with human  
122 ACE2 peptidase domain (PD) (Fig. S3). We obtained two cryo-EM maps (Fig. 2B), including  
123 a conformation with one RBD up and engaged with an ACE2 (termed Omicron S-ACE2-C1)  
124 and another one containing two “up” RBDs (RBD-1 and RBD-2) bound with ACE2 (termed  
125 Omicron S-ACE2-C2), at 3.69- and 3.66-Å-resolution, respectively (Fig. S4A-B, and Table  
126 S1). In the S-ACE2-C2 map, density of RBD-2-associated ACE2 appears weaker than that of  
127 the stably associated ACE2 on RBD-1. We then built an atomic model for each of the two  
128 structures (Fig. S4C). The population distribution between Omicron S-ACE2-C1 and -C2 is  
129 about 43.9% versus 56.1% (Fig. 2C), displaying an obvious higher one-RBD-up C1 population  
130 than that of the Beta/Kappa/Delta variants (C1 population ranges from 8.3% to 14.1%)  
131 observed in our recent studies<sup>31,32</sup>. These three variants also showed a C3 state with all-three-  
132 up RBDs associated with ACE2 (27.7% to 46.6% populated)<sup>31,32</sup>, not detected here in the  
133 Omicron variant, in line with recent preprint reports<sup>16,28,38</sup>. Taken together, the Omicron S

134 trimer exhibits less ability to transform to the more RBD-up C2/C3 states as compared to that  
135 of the Beta, Kappa, and Delta VOCs.

136 To further understand the structural details of the RBD-ACE2 interaction interface, we  
137 focus-refined the stably associated Omicron RBD-1-ACE2 region to 3.67-Å-resolution (Fig.  
138 2D and Fig. S4A). Inspection of this map revealed that many of the substitutions in RBM,  
139 including Q493R, G496S, Q498R, S477N, and Y505H, exhibit new interactions with ACE2  
140 receptor compared with the interaction interface of the WT RBD-ACE2 (PDB: 6M0J)<sup>26</sup>.  
141 Specifically, Q493R with ACE2 E35 and Q498R with ACE2 D38 form three new salt bridges;  
142 G496S and Y505H both with ACE2 K353, Q498R with ACE2 Q42, and S477N with ACE2  
143 Q19 form new H-bonds (Fig. 2D-E, Table. S4), generally in line with recent studies<sup>16,28,38-41</sup>.  
144 Moreover, we observed an extra H-bond between T500 and ACE2 D355 (Fig. 2E). Our  
145 previous research defined that Y505A obviously decreased ACE2 binding affinity<sup>36</sup>, so Y505H  
146 mutation in Omicron may maintain or even enhance ACE2 binding. In the meanwhile, the  
147 K417N substitution, occurred in Omicron as well as in Beta and Delta variants, is known to  
148 markedly reduce ACE2 binding through abolishing multiple salt bridges/H-bonds with ACE2  
149 D30<sup>26,42,43</sup>. Together, these newly formed RBM-ACE2 interactions may compensate the loss  
150 of some original RBM-ACE2 interactions due to the residue changes introduced into the  
151 Omicron RBM.

152 Further inspection of the surface property showed that the substitutions in RBM,  
153 especially Q493R, G496S, Q498R, and Y505H, render the substituted site within the ACE2  
154 interaction footprint more positively charged, which could strengthen the RBM interaction with  
155 the overall negatively charged ACE2 in the interaction interface (Fig. 2G-H). Corroborating  
156 this, the Omicron RBD-ACE2 interaction area (920.2 Å<sup>2</sup>) is enlarged compared to that of the  
157 WT (843.3 Å<sup>2</sup>), while it is comparable to that of the Delta RBD-ACE2 (928.4 Å<sup>2</sup>)<sup>32</sup> (Fig. 2F).  
158 This is also in agreement with our BLI data showing that the ACE2-binding affinity of the  
159 Omicron S is similar to that of the Delta S but is higher than that of the G614 S (Fig. 2A).

## 160 **Sensitivity of Omicron to select neutralizing antibodies**

161 We have generated a number of MAbs that potentially neutralize the original SARS-CoV-2  
162 strain in previous studies<sup>29,44</sup>. Five of these MAbs, including 2H2<sup>44</sup>, 3C1<sup>44</sup>, 8D3<sup>44</sup>, S5D2<sup>29</sup>, and  
163 S3H3<sup>29</sup>, were selected and tested in parallel for neutralization of the wild-type (WT, Wuhan-  
164 Hu-1 strain), Delta, or Omicron pseudoviruses. The neutralization data were shown in Fig. 3A-  
165 B. It was found that the IC50 values of MAbs 3C1, 2H2, 8D3, and S3H3 against Delta were

166 comparable (less than 2.5-fold variation) to the corresponding ones against WT, whereas S5D2  
167 was still neutralizing to Delta ( $IC_{50} = 734.6$  ng/mL) but was about 90-fold less potent. In  
168 Omicron neutralization tests, three MAbs, 3C1, 8D3, and S5D2, lost neutralization activity  
169 ( $IC_{50} > 10$   $\mu$ g/mL). However, 2H2 and S3H3 remained highly effective against Omicron with  
170  $IC_{50}$ s being 30.4 and 53.3 ng/mL, respectively, despite that a 3.3-fold increase (relative to the  
171 WT) in  $IC_{50}$  value was observed for 2H2. These data demonstrate that 2H2 and S3H3 are two  
172 potent neutralizing MAbs against Omicron and also show that Omicron can more extensively  
173 escape antibody neutralization than Delta.

174 We then compared the binding ability of the five MAbs to the WT, Delta, and Omicron S  
175 proteins by ELISA. As shown in Fig. 3C, for MAb S5D2, its binding to the Delta and to the  
176 Omicron S was nearly abolished; for MAbs 3C1 and 8D3, their reactivity profile with the Delta  
177 S closely resembled that towards the WT S but their binding to the Omicron S reduced  
178 significantly; for MAb 2H2, its binding curve to the Omicron S was similar to those towards  
179 the WT and Delta S despite the binding efficiency to the Omicron S was slightly lower;  
180 meanwhile, MAb S3H3 produced nearly identical binding curves to the three S proteins.  
181 Overall, the antigen-binding ability of the MAbs was in good agreement with their  
182 neutralization potency towards specific variant pseudovirus (Fig. 3A-C).

183 Collectively, the above results demonstrate that Omicron remains sensitive to binding and  
184 neutralization by MAbs 2H2 and S3H3 whereas it displays resistance to 3C1, 8D3, and S5D2.

### 185 **Structural basis of Omicron neutralization by a broadly neutralizing antibody S3H3**

186 MAb S3H3 is a unique neutralizing antibody that binds the SD1 region of the WT S<sup>29</sup>. To  
187 understand the structural basis of Omicron neutralization by S3H3, we carried out cryo-EM  
188 study and obtained two structures of the SARS-CoV-2 Omicron S trimer in complex with S3H3  
189 Fab in distinct conformational states (Fig. S5A). Both structures showed two engaged Fab  
190 densities on the SD1 region of protomer 2 and protomer 3, but with the RBD-1 in the up (termed  
191 Omicron S-open-S3H3) or down (termed Omicron S-close-S3H3) conformations (Fig. 4A-B).  
192 The two maps were resolved to the resolution of 3.48 Å and 3.64 Å, respectively (Fig. S5C-D  
193 and Table S1). We then built an atomic model for each of the two structures (Fig.  
194 S5B). Compared with the free Omicron S-open, the S trimer in the S-open-S3H3 structure  
195 exhibited a slight twist and the RBD-1 displayed a 9.1° downward rotation (Fig. 4C), making  
196 the S trimer seemingly less “open” as a whole. Meanwhile, the SD1 showed a slight downward  
197 rotation (Fig. 4C).

198 To examine the interaction interface between the S3H3 Fab and the Omicron SD1, we  
199 further focused refined the SD1-S3H3 Fab region and obtained a map at 3.61-Å-resolution,  
200 with most of the sidechain densities well resolved (Fig. 4D). Our structural analysis suggested  
201 that the heavy chain of S3H3 Fab contributes more to the interactions with SD1 than the light  
202 chain does, i.e., all the three heavy-chain CDRs of S3H3 and its CDRL1 and CDRL3 interact  
203 with T323-E324 and the three loops (loop<sup>532-537</sup>, loop<sup>554-556</sup>, and loop<sup>581-584</sup>) of SD1 (Fig. 4E-F  
204 and Table. S7). Specifically, the S32 of CDRL1 forms H-bonds with the S555 and I584 of SD1,  
205 respectively, the D102 of CDRH3 forms a H-bond with the T581 from loop<sup>581-584</sup>, and the D55  
206 of CDRH2 forms a salt bridge with the K537 from loop<sup>532-537</sup> (Fig. 4G and Table. S6), thus  
207 constituting an intense interaction network between S3H3 Fab and SD1. A single mutation,  
208 T547K, is present in the SD1 region of Omicron, however, this mutation locates outside the  
209 footprint of S3H3 (Fig. 4F), thus will not affect the interaction between S3H3 and Omicron S.  
210 Collectively, S3H3 binds the extremely conserved SD1 region, therefore retains binding and  
211 neutralizing activity towards major VOCs including Omicron.

## 212 Discussion

213 The SARS-CoV-2 Omicron variant has replaced the Delta variant and is now the  
214 predominant circulating VOC in many countries<sup>14</sup>. With 37 mutations in its spike, this variant  
215 shows striking immune evasion while it also displays increased binding affinity with human  
216 ACE2 relative to the WT strain<sup>15,16,28</sup>. Recent reports also showed that the Omicron S exhibits  
217 reduced furin cleavage and less S1 shedding<sup>45,46</sup>. It is essential to understand how the mutations  
218 present in the Omicron S contribute to the higher transmissibility and immune escape observed  
219 for this threatening variant. In this study, we performed cryo-EM study and biochemical  
220 analysis on the Omicron S trimer and its complex with ACE2 receptor or a broadly neutralizing  
221 antibody S3H3. We captured both the closed and the open states of the Omicron S trimer (Fig.  
222 1A-B). In contrast to the S trimer of Delta/Beta/Kappa variants<sup>31,32</sup>, the Omicron S-close and  
223 S-open structures appear more twisted/compact than their counterpart of the G614 strain (Fig.  
224 1F-G). This could be related to the unique Omicron substitution (T547K, N856K, and N764K  
225 in SD1 and S2)–induced enhanced interactions between neighboring protomers and between  
226 S1 and S2 subunits (Fig. 1I), which may hinder its spike transformation towards the fusion-  
227 prone open state and shielding of S1.

228 Noteworthy, our cryo-EM analysis revealed the dominantly populated (61%)  
229 conformation for the Omicron S trimer is in the closed state with all the RBDs buried, resulting  
230 in conformational masking preventing antibody binding and neutralization at sites of receptor



231 binding, similar to that described for HIV-1 envelope<sup>47,48</sup>. This Omicron conformational  
232 masking mechanism of neutralization escape could affect all antibodies that bind to the up  
233 RBDs (such as class 1, 2, and 4 RBD antibodies<sup>49</sup>). While for Delta S trimer, our recent work  
234 showed the open-transition ratio is 75.3%-24.7%, indicating the conformational masking  
235 mechanism may be less effective for the Delta variant<sup>32,36</sup>. This could contribute greatly to the  
236 striking immune evasion of the Omicron variant<sup>15,17-22</sup>.

237 We then captured two states for the Omicron S/ACE2 complex with S binding one or two  
238 ACE2s under our experimental conditions (Fig. 2B-C). However, unlike the Delta S which  
239 tends to bind three ACE2 in majority<sup>32</sup>, Omicron binds up to two ACE2s. Further focus-refined  
240 RBD-1/ACE2 structure demonstrated that the substitutions on the RBM of Omicron (especially  
241 Q493R, G496S, Q498R, S477N, and Y505H) result in formation of new salt bridges and H-  
242 bonds, as well as more complementary electrostatic surface properties (Fig. 2E-H), which  
243 together may compensate abolished original RBM-ACE2 interactions<sup>26,42,43</sup>, leading to  
244 enhanced interactions with ACE2 and potentially enhanced transmissibility of the Omicron  
245 variant.

246 SARS-CoV-2 variants gain series of mutations in their S proteins, including RBD and  
247 NTD. As a consequence, VOCs significantly impact the potency of neutralizing antibodies  
248 originally developed against WT strains<sup>50,51</sup>. Omicron contains specific alterations that have  
249 previously been shown to impact vaccine resistance and also some newly introduced mutations.  
250 It is thus important to determine whether antibodies capable of neutralizing Omicron exist and  
251 if yes where they target. In the present study, we screened a panel of five previously isolated  
252 and characterized neutralizing MAbs<sup>44</sup> for their potency against Omicron and Delta variants.  
253 Our results show that 2H2 and S3H3 retain potent neutralization towards Omicron and Delta  
254 (Fig. 3). Further structural study on the Omicron S-S3H3 Fab complex revealed a unique  
255 binding epitope of S3H3 within the SD1 region which links the S1 and S2 domains (Fig. 4A-  
256 E). S3H3 binding to S trimer may function as a “lock” to block the releasing of S1 from S2,  
257 resulting in inhibition of virus entry. The SD1 region targeted by S3H3 is extremely conserved  
258 among SARS-CoV-2 strains, with only one mutation T547K (which is away from the S3H3  
259 binding footprint) present in Omicron (Fig. 4F), thus explaining the cross-neutralization ability  
260 of S3H3 towards Omicron, Delta, and other variants<sup>29</sup>. These findings also suggest a possibility  
261 to design SD1-based broad-spectrum SARS-CoV-2 vaccines.

262 In summary, the present study reveals that the Omicron spike is structurally more compact  
263 compared to the counterparts of other VOCs and has the likelihood to associate with fewer

264 ACE2. The compact S-close state with dominant population may indicate a conformational  
265 masking mechanism of immune evasion for Omicron spike. However, the Omicron spike still  
266 maintains strong affinity to ACE2 due to an increased RBM-ACE2 interaction network  
267 contributed by new H-bonds/salt bridges and more favorable surface properties, thus providing  
268 a possible explanation to the high transmissibility of Omicron. In addition, our work shows  
269 that Omicron is able to escape majority of the RBD-directed MAbs owing to a relatively large  
270 number of residue changes in RBD and conformational masking, however, this variant remains  
271 sensitive to the SD1-targeting neutralizing MAb S3H3. Our findings provide structural insights  
272 into how Omicron maintains high transmissibility while greatly evades immunity, and may  
273 also inform design of broadly effective vaccines against emerging variants.

274

## 275 **Method**

### 276 **Expression and purification of recombinant proteins**

277 To express SARS-CoV-2 Omicron variant S glycoprotein ectodomain, the mammalian  
278 codon-optimized gene coding SARS-CoV-2 (hCoV-19 Botswana R42B90\_BHP\_000842207  
279 2021, GISAID ID: EPI\_ISL\_6752027) S glycoprotein ectodomain (residues M1-Q1208) with  
280 proline substitutions at K986 and V987, a “GSAS” substitution at the furin cleavage site  
281 (R682–R685) was cloned into vector pcDNA 3.1+. A C-terminal T4 fibrin trimerization motif,  
282 a TEV protease cleavage site, a FLAG tag and a His tag were cloned downstream of the S  
283 glycoprotein ectodomain (Fig. S1A). The constructs of prefusion-stabilized S proteins of  
284 SARS-CoV-2 G614 and Delta (B.1.617.2) variants were prepared as previously reported<sup>32</sup>. A  
285 gene encoding human ACE2 PD domain (Q18-D615) with an N-terminal interleukin-10 (IL-  
286 10) signal peptide and a C-terminal His tag was cloned into vector pcDNA 3.4<sup>36</sup>. The  
287 recombinant proteins were prepared as the published protocol<sup>36</sup>. Briefly, the constructs were  
288 transiently transfected into HEK293F cells using polyethylenimine (PEI). Three days after  
289 transfection, the supernatants were harvested by centrifugation, and then passed through 0.45  
290 µm filter membrane. The clarified supernatants were added with 20 mM Tris-HCl pH 7.5, 200  
291 mM NaCl, 20 mM imidazole, 4 mM MgCl<sub>2</sub>, and incubated with Ni-NTA resin at 4°C for 1  
292 hour. The Ni-NTA resin was recovered and washed with 20 mM Tris-HCl pH 7.5, 200 mM  
293 NaCl, 20 mM imidazole. The protein was eluted by 20 mM Tris-HCl pH 7.5, 200 mM NaCl,  
294 250 mM imidazole.

### 295 **Bio-layer interferometry (BLI) assay**

296 Before BLI assay, Ni-NTA purified recombinant S trimer proteins of the G614, Delta and  
297 Omicron SARS-CoV-2 variants were further purified by gel filtration chromatography using a  
298 Superose 6 increase 10/300 GL column (GE Healthcare) pre-equilibrated with PBS. Then, the  
299 S trimer proteins were biotinylated using the EZ-Link™ Sulfo-NHS-LC-LC-Biotin kit  
300 (Thermo Fisher) and then purified by Zeba™ spin desalting columns (Thermo Fisher).

301 Binding affinities of S trimers to ACE2 were determined by BLI analysis on an Octet  
302 Red96 instrument (Pall FortéBio, USA). Briefly, biotinylated S trimer proteins were  
303 immobilized onto streptavidin (SA) biosensors (Pall FortéBio). After washing with kinetic  
304 buffer (0.01 M PBS with 0.02% Tween 20 and 0.1% bovine serum albumin), these sensors  
305 were incubated with 3-fold serial dilutions of ACE2 monomer protein for 500 s. Subsequently,  
306 the biosensors were allowed to dissociate in kinetic buffer for 500 s. The data were analyzed

307 using the Octet Data Analysis 11.0 software to calculate affinity constants.

### 308 **Neutralization**

309 Luciferase (Luc)-expressing pseudoviruses bearing SARS-CoV-2 S proteins were  
310 constructed based on the HIV-1 backbone. Briefly, HEK 293T cells in 10-cm dish were co-  
311 transfected using PEI (polysciences) with 10 µg of Pcmv-Dr8.91 packaging plasmid, 10 µg of  
312 recombinant Plvx-IRES-ZsGreen1 plasmid containing luciferase reporter gene, and 2 µg of  
313 recombinant Pvox1 plasmids encoding SARS-CoV-2 S proteins. The cells were incubated with  
314 the transfection mixture for 6 h, and then 5 mL of fresh DMEM medium with 10% FBS was  
315 added to each dish. After incubation overnight, the media in the dishes was replaced with fresh  
316 DMEM medium (10% FBS). At 48 h post-transfection, the culture supernatant was harvested  
317 and frozen at -80 °C before use.

318 All MAbs were 4-fold serially diluted and tested by pseudovirus neutralization assay with  
319 human ACE2-overexpressing HEK 293T cells (293T-Hace2) following our previous  
320 protocol<sup>44</sup>. Two days after pseudovirus infection, luciferase activity was measured. Data were  
321 analyzed by non-linear regression using GraphPad Prism 8 to calculate half inhibitory  
322 concentration (IC<sub>50</sub>).

### 323 **ELISA**

324 To test binding activities of recombinant Omicron S protein with our previously  
325 developed anti-SARS-CoV-2 MAbs<sup>29,44</sup>, recombinant S trimer proteins from WT<sup>44</sup>, Delta, or  
326 Omicron SARS-CoV-2 strains were 2-fold serially diluted and coated onto ELISA plates at  
327 37 °C for 2 h. The plates were blocked with 5% milk in PBS-Tween 20 (PBST) at 37 °C for 1  
328 h. After washing with PBST, the plates were incubated with 50 ng/well of each of the anti-  
329 SARS-CoV-2 MAbs<sup>29,44</sup> at 37 °C for 2 h, followed by horseradish peroxidase (HRP)-  
330 conjugated anti-mouse IgG (Sigma, 1/5,000 dilution) at 37 °C for 1 h. After washing and color  
331 development, absorbance was measured at 450 nm. ELISA data were analyzed by non-linear  
332 regression using GraphPad Prism 8.

### 333 **Omicron S trimer/S3H3 Fab complex formation.**

334 The Omicron variant S trimer/S3H3 Fab complex was prepared following our previously  
335 reported protocol<sup>29</sup>. Briefly, purified S3H3 IgG was incubated with papain (300:1 W/W) in  
336 PBS buffer (in the presence of 20 mM L-cysteine and 1 mM EDTA) for 3 h at 37°C. The  
337 reaction was quenched by 20 mM iodoacetamide. Fab was purified by running over a HiTrap  
338 DEAE FF column (GE Healthcare) pre-equilibrated with PBS. Omicron S protein was

339 incubated with S3H3 Fab in a 1:6 molar ratio on ice for 1 h. The Omicron S-S3H3 Fab complex  
340 was purified by size-exclusion chromatography using Superose 6 increase 10/300 GL column  
341 (GE Healthcare) in 20 mM Tris-HCl pH 7.5, 200 mM NaCl, 4% glycerol. The complex peak  
342 fractions were concentrated and assessed by SDS-PAGE.

### 343 **Cryo-EM sample preparation**

344 To prepare the cryo-EM sample of the Omicron S trimer, a 2.2  $\mu$ l aliquot of the sample  
345 was applied on a plasma-cleaned holey carbon grid (R 1.2/1.3, Cu, 200 mesh; Quantifoil). The  
346 grid was blotted with Vitrobot Mark IV (Thermo Fisher Scientific) at 100% humidity and 8  $^{\circ}$ C,  
347 and then plunged into liquid ethane cooled by liquid nitrogen. To prepare the cryo-EM sample  
348 of the Omicron S-ACE2 complex, purified Omicron S trimer was incubated with ACE2 in a  
349 1:4 molar ratio on ice for 20 min and then vitrified using the same condition. The purified  
350 Omicron S-S3H3 complex was vitrified using the same procedure as for the Omicron S sample.

### 351 **Cryo-EM data collection**

352 Cryo-EM movies of the samples were collected on a Titan Krios electron microscope  
353 (Thermo Fisher Scientific) operated at an accelerating voltage of 300 kV. For the three datasets,  
354 the movies were collected at a magnification of 64,000 $\times$  and recorded on a K3 direct electron  
355 detector (Gatan) operated in the counting mode (yielding a pixel size of 1.093  $\text{\AA}$ ), and under a  
356 low-dose condition in an automatic manner using EPU software (Thermo Fisher Scientific).  
357 Each frame was exposed for 0.1 s, and the total accumulation time was 3 s, leading to a total  
358 accumulated dose of 50.2  $e^{-}/\text{\AA}^2$  on the specimen.

### 359 **Cryo-EM 3D reconstruction**

360 For each dataset, the motion correction of image stack was performed using the embedded  
361 module of Motioncor2 in Relion 3.1<sup>36,52,53</sup> and CTF parameters were determined using  
362 CTFFIND4<sup>54</sup> before further data processing. Unless otherwise described, the data processing  
363 was performed in Relion3.1.

364 For the Omicron S dataset (Fig. S2), 600,845 particles remained after reference-free 2D  
365 classification in cryoSPARC v3.3.1<sup>37</sup>. After 3D classification and focused 3D classification on  
366 the RBD-1 region, we obtained an Omicron S-close map from 69,873 particles and an S-open  
367 map from 108,509 particles. After Bayesian polishing and CTF refinement, the Omicron S-  
368 open and S-close datasets were independently loaded into cryoSPARC v3.3.1<sup>37</sup> and refined to  
369 the resolutions of 3.21  $\text{\AA}$  and 3.08  $\text{\AA}$ , respectively, using Non-uniform refinement. The overall  
370 resolution was determined based on the gold-standard criterion using a Fourier shell correlation

371 (FSC) of 0.143. Moreover, we performed 3D Variability analysis (3DVA) on the Omicron S  
372 trimer dataset in cryoSPARC to capture its continuous conformational dynamics<sup>37</sup>.

373 For the Omicron S-ACE2 dataset (Fig. S3), 1,268,072 particles remained after reference-  
374 free 2D classification. After two rounds of 3D classification and further focused 3D  
375 classification on the RBD-1-ACE2 region, we obtained an Omicron S-ACE2 map from  
376 141,538 particles. After Bayesian polishing and CTF refinement, the map was reconstructed to  
377 3.53-Å-resolution. We then focused on RBD-2 for further classification and obtained two  
378 conformations with RBD-2 in the “down” or “up” position, termed S-ACE2-C1 and -C2,  
379 respectively. The two datasets were independently loaded into cryoSPARC v3.3.1 and refined  
380 using Non-uniform refinement to 3.69- and 3.66-Å-resolution, respectively. The overall  
381 resolution was determined based on the gold-standard criterion using a Fourier shell correlation  
382 (FSC) of 0.143. Here, after obtaining the 3.53-Å-resolution map of Omicron S-ACE2, we  
383 performed further local refinement on the RBD-1-ACE2 region in cryoSPARC to acquire a  
384 3.67-Å-resolution map of this region.

385 For the Omicron S-S3H3 dataset (Fig. S5), similar data processing procedure was adapted  
386 as described for the Omicron S dataset to obtain a 3.5-Å-resolution S-S3H3 map from 238,162  
387 particles. We then carried out focused 3D classification on the RBD-1 region, followed by  
388 Non-uniform refinement in cryoSPARC, and obtained a 3.48-Å-resolution S-open-S3H3 map  
389 from 162,221 particles and a 3.64-Å-resolution S-close-S3H3 map from 75,900 particles. In  
390 addition, after obtaining the 3.5-Å-resolution map, we performed focused 3D classification on  
391 the S3H3-SD1 region of protomer 2 (highlighted by dotted orange ellipsoid), leading to a  
392 dataset of 101,192 particles, which was further local refined on the S3H3-SD1 region in  
393 cryoSPARC, deducing a 3.61-Å-resolution map of this region. All of the obtained maps were  
394 post-processed through deepEMhancer<sup>62</sup>.

### 395 **Atomic model building**

396 To build an atomic model for the Omicron S-open structure, we used the atomic model of  
397 Delta S-open (PDB: 7W92) from our prior study as the initial model<sup>32</sup>. We first fit the model  
398 into our Omicron S-open map in Chimera by rigid body fitting, then manually substituted the  
399 mutations of the Omicron variant in COOT<sup>55</sup>. Subsequently, we flexibly refined the model  
400 against our Omicron S-open map using ROSETTA<sup>56</sup>. Finally, we used the  
401 phenix.real\_space\_refine module in Phenix for the S trimer model refinement against the map<sup>57</sup>.  
402 For the S-close model, we utilized the down protomer from our recent Delta S-transition (PDB:

403 7W94)<sup>32</sup> structure as initial template, and followed similar procedure described above for  
404 model refinement. For the Omicron S-ACE2 and the local refined RBD-1-ACE2 structures,  
405 we used the Delta S-ACE2 model (PDB: 7W98, 7W9I)<sup>32</sup> as initial template, and followed  
406 similar procedure described above for model refinement. For the Omicron S-S3H3 and the  
407 local refined RBD-1-S3H3 structures, we utilized our recent Beta S-S3H3 model (PDB:  
408 7WDF)<sup>29</sup> as template, and followed similar procedure described above for model refinement.  
409 The atomic models were validated using Phenix.molprobity command in Phenix. Interaction  
410 interface analyses were conducted through PISA server<sup>58</sup>.

411 UCSF Chimera and ChimeraX were applied for figure generation, rotation measurement,  
412 and coulombic potential surface analysis<sup>59,60</sup>.

## 413 **References**

- 414 1 Grabowski, F., Preibisch, G., Gizinski, S., Kochanczyk, M. & Lipniacki, T. SARS-  
415 CoV-2 Variant of Concern 202012/01 Has about Twofold Replicative Advantage and  
416 Acquires Concerning Mutations. *Viruses* **13**, doi:10.3390/v13030392 (2021).
- 417 2 Wise, J. Covid-19: New coronavirus variant is identified in UK. *Bmj* **371**, m4857,  
418 doi:10.1136/bmj.m4857 (2020).
- 419 3 Davies, N. G. *et al.* Estimated transmissibility and impact of SARS-CoV-2 lineage  
420 B.1.1.7 in England. *Science* **372**, doi:10.1126/science.abg3055 (2021).
- 421 4 Gobeil, S. M. *et al.* Effect of natural mutations of SARS-CoV-2 on spike structure,  
422 conformation, and antigenicity. *Science*, doi:10.1126/science.abi6226 (2021).
- 423 5 Cai, Y. *et al.* Structural basis for enhanced infectivity and immune evasion of SARS-  
424 CoV-2 variants. *Science*, doi:10.1126/science.abi9745 (2021).
- 425 6 Yuan, M. *et al.* Structural and functional ramifications of antigenic drift in recent  
426 SARS-CoV-2 variants. *Science*, doi:10.1126/science.abh1139 (2021).
- 427 7 Tegally, H. *et al.* Detection of a SARS-CoV-2 variant of concern in South Africa.  
428 *Nature* **592**, 438-443, doi:10.1038/s41586-021-03402-9 (2021).
- 429 8 Msomi, N., Mlisana, K., de Oliveira, T. & Network for Genomic Surveillance in South  
430 Africa writing, g. A genomics network established to respond rapidly to public health  
431 threats in South Africa. *Lancet Microbe* **1**, e229-e230, doi:10.1016/S2666-  
432 5247(20)30116-6 (2020).
- 433 9 Voloch, C. M. *et al.* Genomic characterization of a novel SARS-CoV-2 lineage from  
434 Rio de Janeiro, Brazil. *Journal of virology*, doi:10.1128/JVI.00119-21 (2021).
- 435 10 Singh, J., Rahman, S. A., Ehtesham, N. Z., Hira, S. & Hasnain, S. E. SARS-CoV-2  
436 variants of concern are emerging in India. *Nat Med* **27**, 1131-1133,  
437 doi:10.1038/s41591-021-01397-4 (2021).
- 438 11 Winger, A. & Caspari, T. The Spike of Concern-The Novel Variants of SARS-CoV-2.  
439 *Viruses* **13**, doi:10.3390/v13061002 (2021).
- 440 12 Grabowski, F., Kochańczyk, M. & Lipniacki, T. Omicron strain spreads with the  
441 doubling time of 3.2—3.6 days in South Africa province of Gauteng that achieved herd  
442 immunity to Delta variant. *medRxiv*, doi:10.1101/2021.12.08.21267494 (2021).
- 443 13 Burki, T. K. Omicron variant and booster COVID-19 vaccines. *The Lancet Respiratory*  
444 *Medicine*, doi:10.1016/s2213-2600(21)00559-2 (2021).



- 445 14 WHO. Enhancing readiness for Omicron (B.1.1.529): Technical brief and priority  
446 actions for Member States. [https://www.who.int/publications/m/item/enhancing-](https://www.who.int/publications/m/item/enhancing-readiness-for-omicron-(b.1.1.529)-technical-brief-and-priority-actions-for-member-states)  
447 [readiness-for-omicron-\(b.1.1.529\)-technical-brief-and-priority-actions-for-member-](https://www.who.int/publications/m/item/enhancing-readiness-for-omicron-(b.1.1.529)-technical-brief-and-priority-actions-for-member-states)  
448 [states](https://www.who.int/publications/m/item/enhancing-readiness-for-omicron-(b.1.1.529)-technical-brief-and-priority-actions-for-member-states) (2021).
- 449 15 Cameroni, E. *et al.* Broadly neutralizing antibodies overcome SARS-CoV-2 Omicron  
450 antigenic shift. *Nature*, doi:10.1038/d41586-021-03825-4 (2021).
- 451 16 Mannar, D. *et al.* SARS-CoV-2 Omicron Variant: ACE2 Binding, Cryo-EM Structure  
452 of Spike Protein-ACE2 Complex and Antibody Evasion. *BioRxiv*,  
453 doi:10.1101/2021.12.19.473380 (2021).
- 454 17 Hoffmann, M. *et al.* The Omicron variant is highly resistant against antibody-mediated  
455 neutralization – implications for control of the COVID-19 pandemic. *Cell*,  
456 doi:10.1016/j.cell.2021.12.032 (2021).
- 457 18 Carreño, J. M. *et al.* Activity of convalescent and vaccine serum against SARS-CoV-2  
458 Omicron. *Nature*, doi:10.1038/d41586-021-03846-z (2021).
- 459 19 Liu, L. *et al.* Striking antibody evasion manifested by the Omicron variant of SARS-  
460 CoV-2. *Nature*, doi:10.1038/d41586-021-03826-3 (2021).
- 461 20 Cao, Y. *et al.* Omicron escapes the majority of existing SARS-CoV-2 neutralizing  
462 antibodies. *Nature*, doi:10.1038/d41586-021-03796-6 (2021).
- 463 21 Planas, D. *et al.* Considerable escape of SARS-CoV-2 Omicron to antibody  
464 neutralization. *Nature*, doi:10.1038/d41586-021-03827-2 (2021).
- 465 22 Cele, S. *et al.* Omicron extensively but incompletely escapes Pfizer BNT162b2  
466 neutralization. *Nature*, doi:10.1038/d41586-021-03824-5 (2021).
- 467 23 Tang, T., Bidon, M., Jaimes, J. A., Whittaker, G. R. & Daniel, S. Coronavirus  
468 membrane fusion mechanism offers a potential target for antiviral development.  
469 *Antiviral Res* **178**, 104792, doi:10.1016/j.antiviral.2020.104792 (2020).
- 470 24 Rabaan, A. A. *et al.* SARS-CoV-2, SARS-CoV, and MERS-COV: A comparative  
471 overview. *Infez Med* **28**, 174-184 (2020).
- 472 25 Wang, Q. *et al.* Structural and Functional Basis of SARS-CoV-2 Entry by Using Human  
473 ACE2. *Cell* **181**, 894-904 e899, doi:10.1016/j.cell.2020.03.045 (2020).
- 474 26 Lan, J. *et al.* Structure of the SARS-CoV-2 spike receptor-binding domain bound to the  
475 ACE2 receptor. *Nature* **581**, 215-220, doi:10.1038/s41586-020-2180-5 (2020).
- 476 27 Shang, J. *et al.* Structural basis of receptor recognition by SARS-CoV-2. *Nature* **581**,  
477 221-224, doi:10.1038/s41586-020-2179-y (2020).

- 478 28 Yin, W. *et al.* Structures of the Omicron Spike trimer with ACE2 and an anti-Omicron  
479 antibody. *bioRxiv*, 2021.2012.2027.474273, doi:10.1101/2021.12.27.474273 (2021).
- 480 29 Xu, S. *et al.* Mapping cross-variant neutralizing sites on the SARS-CoV-2 spike protein.  
481 *Emerging Microbes & Infections*, 1-51, doi:10.1080/22221751.2021.2024455 (2021).
- 482 30 Zhang, J. *et al.* Structural impact on SARS-CoV-2 spike protein by D614G substitution.  
483 *Science* **372**, 525-530, doi:10.1126/science.abf2303 (2021).
- 484 31 Wang, Y. *et al.* Conformational dynamics of the Beta and Kappa SARS-CoV-2 spike  
485 proteins and their complexes with ACE2 receptor revealed by cryo-EM. *Nat Commun*  
486 doi:10.1038/s41467-021-27350-0 (2021).
- 487 32 Wang, Y. *et al.* Structural basis for SARS-CoV-2 Delta variant recognition of ACE2  
488 receptor and broadly neutralizing antibodies. *Nat Commun (Accepted in principle)*  
489 (2022).
- 490 33 Toelzer, C. *et al.* Free fatty acid binding pocket in the locked structure of SARS-CoV-  
491 2 spike protein. *Science* **370**, 725-730, doi:10.1126/science.abd3255 (2020).
- 492 34 Wrobel, A. G. *et al.* SARS-CoV-2 and bat RaTG13 spike glycoprotein structures  
493 inform on virus evolution and furin-cleavage effects. *Nature structural & molecular*  
494 *biology* **27**, 763-767, doi:10.1038/s41594-020-0468-7 (2020).
- 495 35 Cai, Y. *et al.* Distinct conformational states of SARS-CoV-2 spike protein. *Science*,  
496 doi:10.1126/science.abd4251 (2020).
- 497 36 Xu, C. *et al.* Conformational dynamics of SARS-CoV-2 trimeric spike glycoprotein in  
498 complex with receptor ACE2 revealed by cryo-EM. *Sci Adv* **7**,  
499 doi:10.1126/sciadv.abe5575 (2021).
- 500 37 Punjani, A., Rubinstein, J. L., Fleet, D. J. & Brubaker, M. A. cryoSPARC: algorithms  
501 for rapid unsupervised cryo-EM structure determination. *Nat Methods* **14**, 290-296,  
502 doi:10.1038/nmeth.4169 (2017).
- 503 38 Cui, Z. *et al.* Structural and functional characterizations of altered infectivity and  
504 immune evasion of SARS-CoV-2 Omicron variant. *BioRxiv*,  
505 doi:10.1101/2021.12.29.474402 (2021).
- 506 39 McCallum, M. *et al.* Structural basis of SARS-CoV-2 Omicron immune evasion and  
507 receptor engagement. *BioRxiv*, doi:10.1101/2021.12.28.474380 (2021).
- 508 40 Lan, J. *et al.* Structural and computational insights into the SARS-CoV-2 Omicron  
509 RBD-ACE2 interaction. *BioRxiv*, doi:10.1101/2022.01.03.474855 (2022).
- 510 41 Han, P. *et al.* Receptor binding and complex structures of human ACE2 to spike RBD  
511 from Omicron and Delta SARS-CoV-2. *Cell*, doi:10.1016/j.cell.2022.01.001 (2022).

- 512 42 Mannar, D. *et al.* Structural analysis of receptor binding domain mutations in SARS-  
513 CoV-2 variants of concern that modulate ACE2 and antibody binding. *Cell Rep* **37**,  
514 110156, doi:10.1016/j.celrep.2021.110156 (2021).
- 515 43 Laffeber, C., de Koning, K., Kanaar, R. & Lebbink, J. H. G. Experimental Evidence for  
516 Enhanced Receptor Binding by Rapidly Spreading SARS-CoV-2 Variants. *Journal of*  
517 *molecular biology* **433**, 167058, doi:10.1016/j.jmb.2021.167058 (2021).
- 518 44 Zhang, C. *et al.* Development and structural basis of a two-MAb cocktail for treating  
519 SARS-CoV-2 infections. *Nature Communications* **12**, doi:10.1038/s41467-020-20465-  
520 w (2021).
- 521 45 Zeng, C. *et al.* Neutralization and Stability of SARS-CoV-2 Omicron Variant. *BioRxiv*,  
522 doi:10.1101/2021.12.16.472934 (2021).
- 523 46 Meng, B. *et al.* SARS-CoV-2 Omicron spike mediated immune escape, infectivity and  
524 cell-cell fusion. *BioRxiv*, doi:10.1101/2021.12.17.473248 (2021).
- 525 47 Kwong, P. D. *et al.* HIV-1 evades antibody-mediated neutralization through  
526 conformational masking of receptor-binding sites. *Nature* **420**, 678-682,  
527 doi:10.1038/nature01188 (2002).
- 528 48 Munro, J. B. *et al.* Conformational dynamics of single HIV-1 envelope trimers on the  
529 surface of native virions. *Science* **346**, 759-763, doi:10.1126/science.1254426 (2014).
- 530 49 Barnes, C. O. *et al.* SARS-CoV-2 neutralizing antibody structures inform therapeutic  
531 strategies. *Nature* **588**, 682-687, doi:10.1038/s41586-020-2852-1 (2020).
- 532 50 Joshi, N., Tyagi, A. & Nigam, S. Molecular Level Dissection of Critical Spike  
533 Mutations in SARS-CoV-2 Variants of Concern (VOCs): A Simplified Review.  
534 *ChemistrySelect* **6**, 7981-7998, doi:10.1002/slct.202102074 (2021).
- 535 51 Campbell, F. *et al.* Increased transmissibility and global spread of SARS-CoV-2  
536 variants of concern as at June 2021. *Euro Surveill* **26**, doi:10.2807/1560-  
537 7917.ES.2021.26.24.2100509 (2021).
- 538 52 Zheng, S. Q. *et al.* MotionCor2: anisotropic correction of beam-induced motion for  
539 improved cryo-electron microscopy. *Nat Methods* **14**, 331-332,  
540 doi:10.1038/nmeth.4193 (2017).
- 541 53 Fernandez-Leiro, R. & Scheres, S. H. W. A pipeline approach to single-particle  
542 processing in RELION. *Acta Crystallogr D Struct Biol* **73**, 496-502,  
543 doi:10.1107/S2059798316019276 (2017).
- 544 54 Rohou, A. & Grigorieff, N. CTFFIND4: Fast and accurate defocus estimation from  
545 electron micrographs. *J Struct Biol* **192**, 216-221, doi:10.1016/j.jsb.2015.08.008 (2015).

- 546 55 Emsley, P. & Cowtan, K. Coot: model-building tools for molecular graphics. *Acta*  
547 *Crystallogr D Biol Crystallogr* **60**, 2126-2132, doi:10.1107/S0907444904019158  
548 (2004).
- 549 56 DiMaio, F. *et al.* Atomic-accuracy models from 4.5-Å cryo-electron microscopy data  
550 with density-guided iterative local refinement. *Nature methods* **12**, 361-365,  
551 doi:10.1038/nmeth.3286 (2015).
- 552 57 Adams, P. D. *et al.* PHENIX: a comprehensive Python-based system for  
553 macromolecular structure solution. *Acta Crystallogr D Biol Crystallogr* **66**, 213-221,  
554 doi:10.1107/S0907444909052925 (2010).
- 555 58 Krissinel, E. & Henrick, K. Inference of macromolecular assemblies from crystalline  
556 state. *Journal of molecular biology* **372**, 774-797, doi:10.1016/j.jmb.2007.05.022  
557 (2007).
- 558 59 Pettersen, E. F. *et al.* UCSF Chimera--a visualization system for exploratory research  
559 and analysis. *J Comput Chem* **25**, 1605-1612, doi:10.1002/jcc.20084 (2004).
- 560 60 Goddard, T. D. *et al.* UCSF ChimeraX: Meeting modern challenges in visualization  
561 and analysis. *Protein Sci* **27**, 14-25, doi:10.1002/pro.3235 (2018).  
562  
563

## 564 **Acknowledgements**

565 We are grateful to the staffs of the NCPSS Electron Microscopy facility, Database and  
566 Computing facility, and Protein Expression and Purification facility for instrument support and  
567 technical assistance. This work was supported by grants from the Strategic Priority Research  
568 Program of CAS (XDB37040103 and XDB29040300), National Key R&D Program of China  
569 (2017YFA0503503 and 2020YFC0845900), the NSFC (32130056 and 31872714), the NSFC-  
570 ISF 31861143028, Shanghai Academic Research Leader (20XD1404200). Chao Zhang is  
571 supported by the Youth Innovation Promotion Association of the Chinese Academy of  
572 Sciences (CAS) and Shanghai Rising-Star Program (21QA1410000).

## 573 **Author contributions**

574 Y.C. and Z.H. designed the experiments; Y-X. Wang expressed and purified the proteins  
575 with assistants of Z.L. and S.X.; Q.H. and W.H. performed cryo-EM data acquisitions; Q.H.,  
576 W.H., J.L., and Y-F. Wang performed cryo-EM reconstructions, model buildings; C.Z. and  
577 S.X. performed biochemical analyses; J.L. Q.H., W.H., Y-F. Wang and C.Z. analyzed the data;  
578 Y.C. and Z.H. together with Q.H., J.L. W.H., Y-X. Wang and C.Z. wrote the manuscript.

## 579 **Data availability**

580 All data presented in this study are available within the figures and in the Supplementary  
581 Information. Cryo-EM maps determined for the SARS-CoV-2 Omicron S trimer have been  
582 deposited at the Electron Microscopy Data Bank with accession codes EMD-32556 and EMD-  
583 32557, and the associated atomic models have been deposited in the Protein Data Bank with  
584 accession codes 7WK2 and 7WK3 for S-open and S-close, respectively. For the S-ACE2  
585 dataset, related cryo-EM maps have been deposited in the Electron Microscopy Data Bank with  
586 accession codes EMD-32558, EMD-32559 and EMD-32560, and the associated models have  
587 been deposited in the Protein Data Bank with accession codes 7WK4, 7WK5 and 7WK6 for  
588 S-ACE2-C1, S-ACE2-C2 and RBD-1-ACE2, respectively. For the S-S3H3 Fab dataset, related  
589 cryo-EM maps have been deposited in the Electron Microscopy Data Bank with accession  
590 codes EMD-32562, EMD-32563, and EMD-32564, and the associated models have been  
591 deposited in the Protein Data Bank with accession codes 7WK8, 7WK9 and 7WKA for SD1-  
592 S3H3, S-open-S3H3 and S-close-S3H3, respectively.

## 593 **Competing interests**

594 Z.H., S.Q.X., and C.Z. are listed as inventors on a pending patent application for MAb S3H3.

595      The other authors declare that they have no competing interests.

596

597 **Figures**

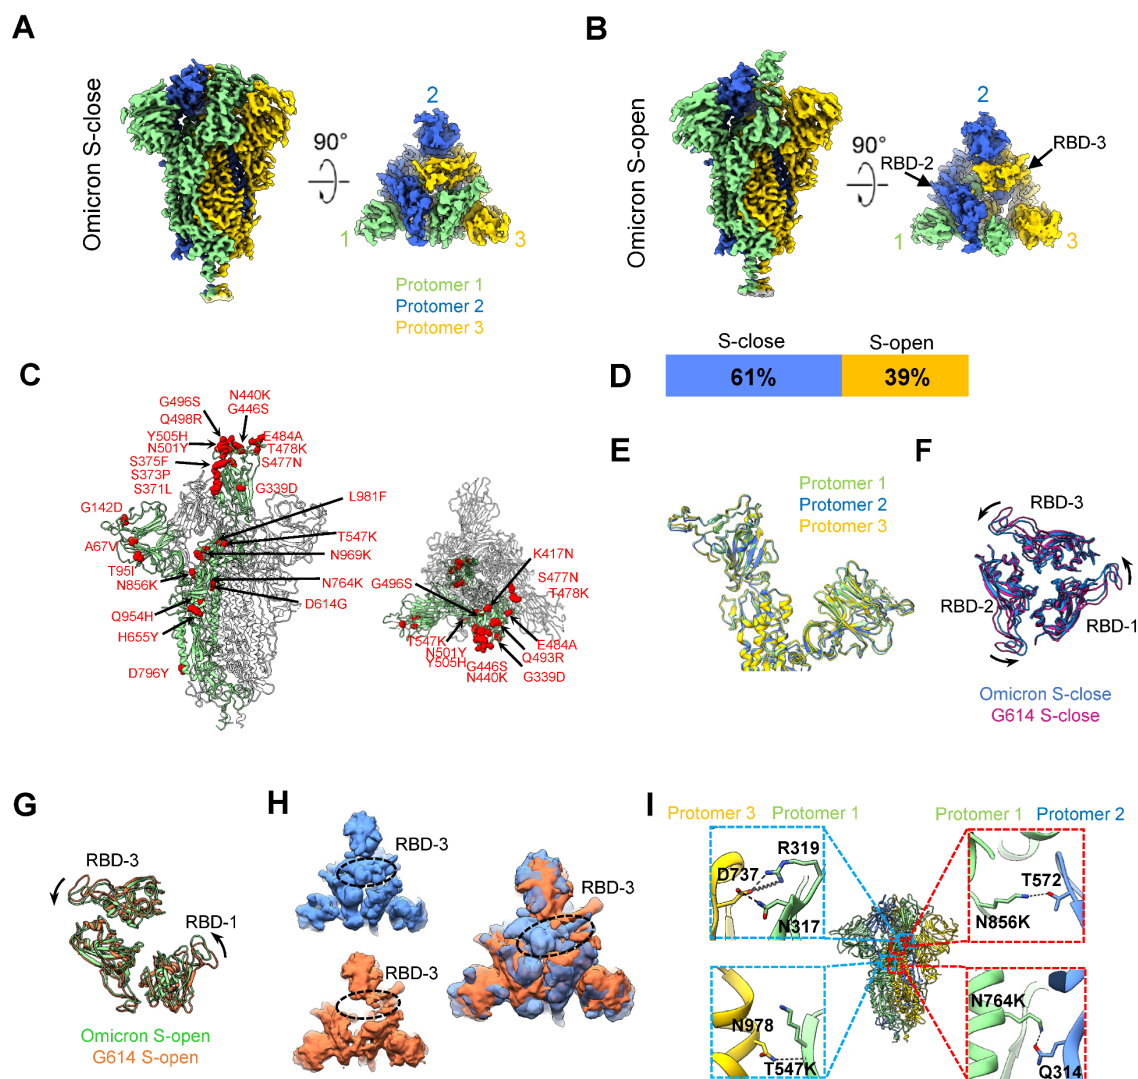

598

599 **Fig. 1 Cryo-EM structures of the SARS-CoV-2 Omicron S trimer.** (A-B) Cryo-EM maps  
 600 of the Omicron S-close (A) and S-open (B) state. Protomer 1, 2, and 3 are shown in light green,  
 601 royal blue, and gold, respectively, which color scheme was followed throughout. (C) Atomic  
 602 model of the Omicron S-open, with mutations indicated by red sphere and labeled. (D)  
 603 Population distribution of the Omicron S-close and S-open. (E) Side view of the overlaid  
 604 protomers of the Omicron S-close. (F) Top view of the overlaid RBDs of the Omicron S-close  
 605 (blue) and the G614 S-close (PDB: 7KRQ, purple), indicating a twist of the Omicron S-close  
 606 relative to that of G614. (G) Top view of the overlaid RBDs of the Omicron S-open (light green)  
 607 and the G614 S-open (PDB: 7KRR, orange), indicating a twist of the Omicron S-open relative  
 608 to that of G614. (H) One representative 3DVA motions of the Omicron S dataset. The left two  
 609 maps illustrate the top view of two extremes in the motion with the RBD-3 indicated by dotted  
 610 black ellipsoid, and the top view of the overlaid two extreme maps is shown in the right. (I)

611 Newly formed H-bonds (black dashed line) and salt bridges (spring) in the interfaces of  
612 protomer 1/3 and protomer 1/2 of the S-close state.  
613



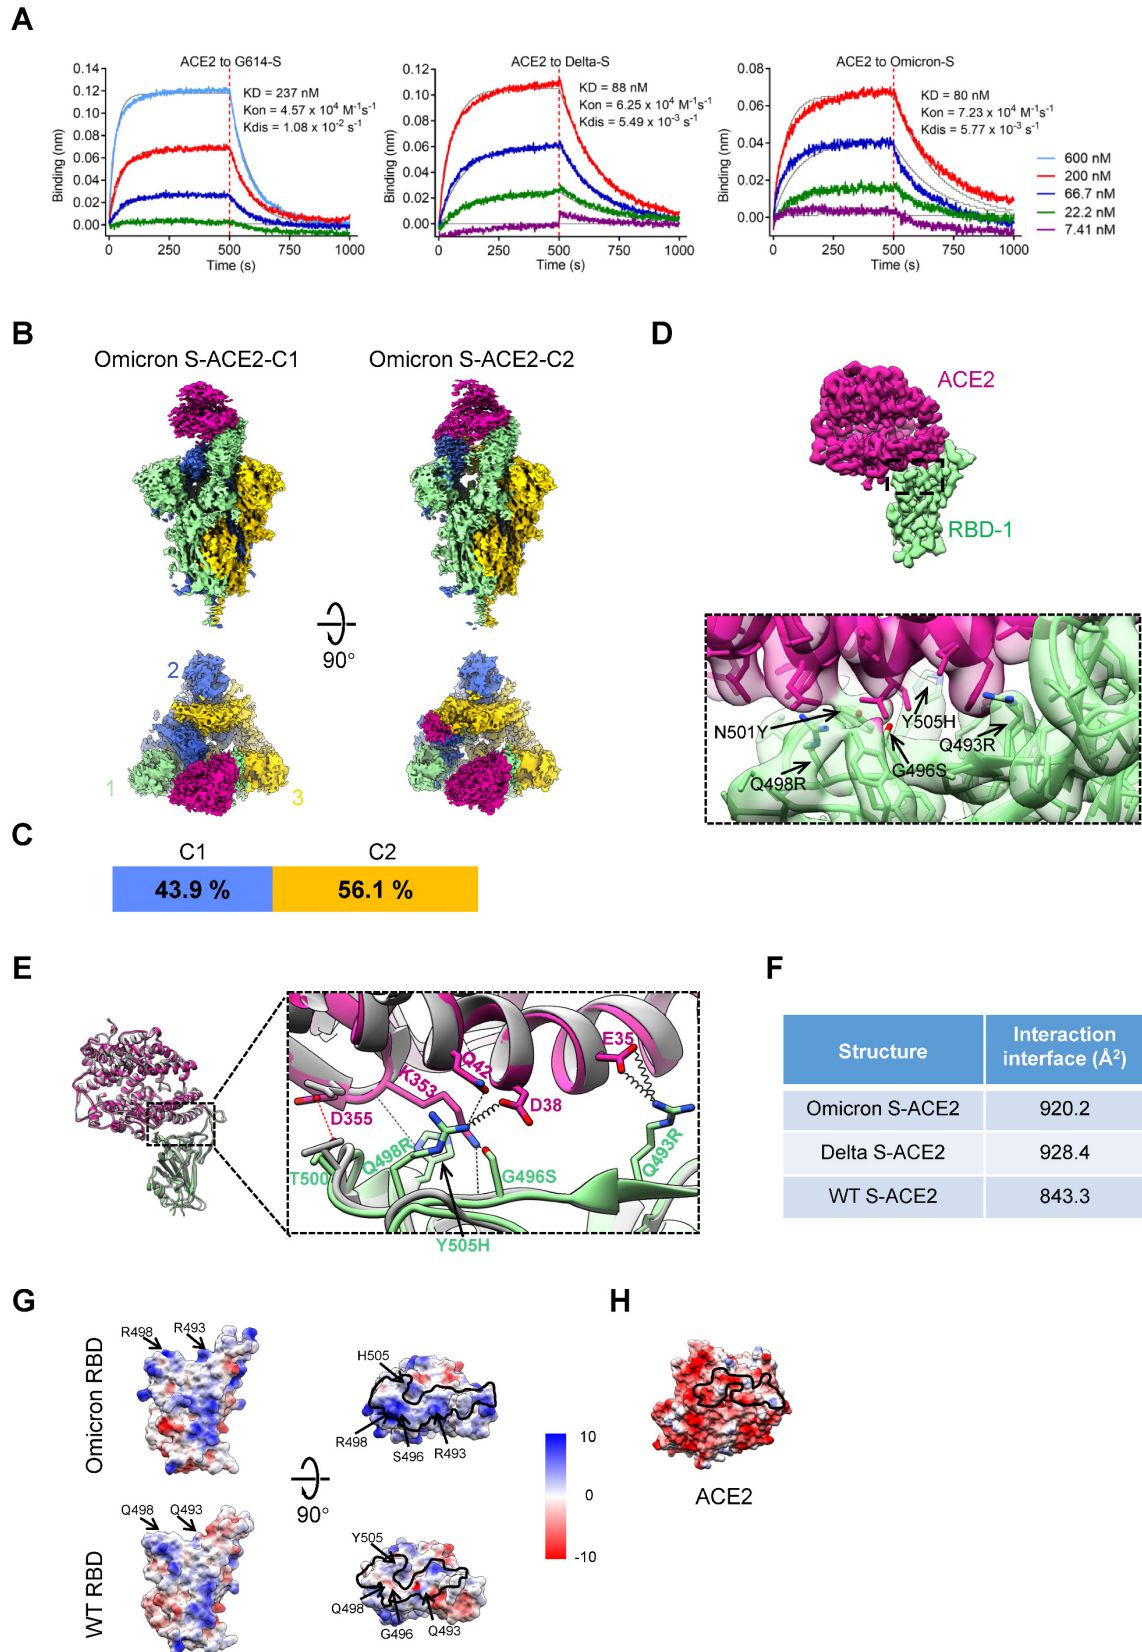

614

615 **Fig. 2 Structural basis of enhanced Omicron variant S trimer/ACE2 interaction.** (A)  
 616 Measurement of the binding affinity between ACE2 monomer and the S trimer of the G614  
 617 (left), Delta (middle) or Omicron (right) variants using bio-layer interferometry (BLI).

618 Biotinylated S trimers were loaded onto streptavidin sensors and then allowed to interact with  
619 different concentrations of ACE2 (shown on the right). Raw sensorgrams and fitting curves  
620 were shown in color and gray, respectively. Association and dissociation phases were divided  
621 by red dotted lines. (B) Cryo-EM maps of the Omicron S-ACE2 complex in two distinct  
622 conformational states. ACE2 is shown in violet red. This color scheme is followed throughout.  
623 (C) Population distribution of the Omicron S-ACE2 conformers. (D) Density map of the  
624 focused refined Omicron RBD-1-ACE2 and the zoomed-in view of the RBD-ACE2 interaction  
625 interface, showing the side chain densities of the Q493R, G496S, Q498R, N501Y and Y505H  
626 on RBM. (E) The substituted residues R493, S496, R498 and H505 of Omicron RBM form  
627 new interactions with E35, D38, Q42 and K353 of ACE2 (spring represents salt bridge, and  
628 the black dashed line represents H-bond) relative to that in WT RBD-ACE2 (PDB: 6M0J, in  
629 dark grey). A newly formed H-bond without substitution is shown in red dashed line. (F)  
630 Interaction interface areas between ACE2 and RBD of Omicron, Delta (PDB: 7W9I), or WT  
631 (PDB: 6M0J), analyzed using PISA. (G) The electrostatic surface properties of Omicron and  
632 WT RBMs, with the mutated residues indicated. Black lines depict the footprint of ACE2 on  
633 RBD. (H) The electrostatic surface property of ACE2, with residues in proximity to RBD-1 (<  
634 4 Å) indicated (Table. S5).  
635

**A**

| MAb  | IC50 value (ng/mL) |       |         | IC50 value (nM) |       |         | IC50 fold change in variant PV neutralization (relative to WT) |         |
|------|--------------------|-------|---------|-----------------|-------|---------|----------------------------------------------------------------|---------|
|      | WT                 | Delta | Omicron | WT              | Delta | Omicron | Delta                                                          | Omicron |
| 3C1  | 286.7              | 231.1 | >10000  | 1.911           | 1.541 | >66.667 | 1.2                                                            | <-34.9  |
| 2H2  | 9.1                | 6.3   | 30.4    | 0.061           | 0.042 | 0.203   | 1.4                                                            | -3.3    |
| 8D3  | 6.5                | 6.4   | >10000  | 0.043           | 0.043 | >66.667 | 1.0                                                            | <-1538  |
| S5D2 | 8.2                | 734.6 | >10000  | 0.055           | 4.897 | >66.667 | -89.6                                                          | <-1220  |
| S3H3 | 82.2               | 39.3  | 53.3    | 0.548           | 0.262 | 0.355   | 2.1                                                            | 1.5     |

**B**

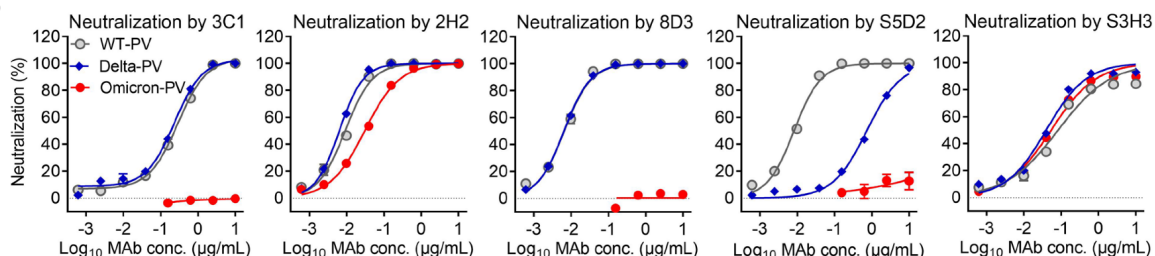

**C**

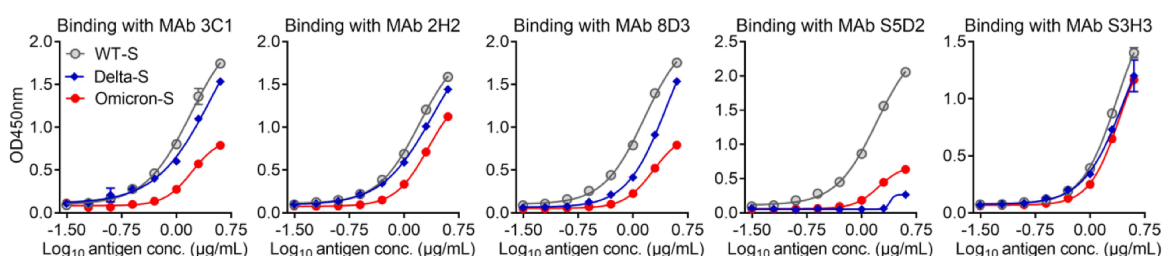

636

637 **Fig. 3 Neutralization and binding activities of the MAbs against SARS-CoV-2 Omicron**

638 **and Delta variants.** The MAbs were raised against WT RBD or S trimer proteins. (A)

639 Neutralization IC50 values and fold changes in neutralization potency for Delta and Omicron

640 variant pseudoviruses (PV) compared to WT pseudovirus. A minus sign (-) denotes decrease.

641 Orange shade, more than 10-fold decrease; red shade, more than 1000-fold decrease. (B)

642 Neutralization of the MAbs towards WT, Delta, and Omicron SARS-CoV-2 pseudoviruses.

643 All MAbs were 4-fold serially diluted. Data are expressed as mean  $\pm$  SEM of four replicate

644 wells. (C) Binding activities of the MAbs to recombinant S trimers of the WT, Delta, and

645 Omicron SARS-CoV-2 strains were tested by ELISA. Serially diluted S trimer proteins were

646 coated onto the ELISA wells. Data are mean  $\pm$  SD of triplicate wells.

647

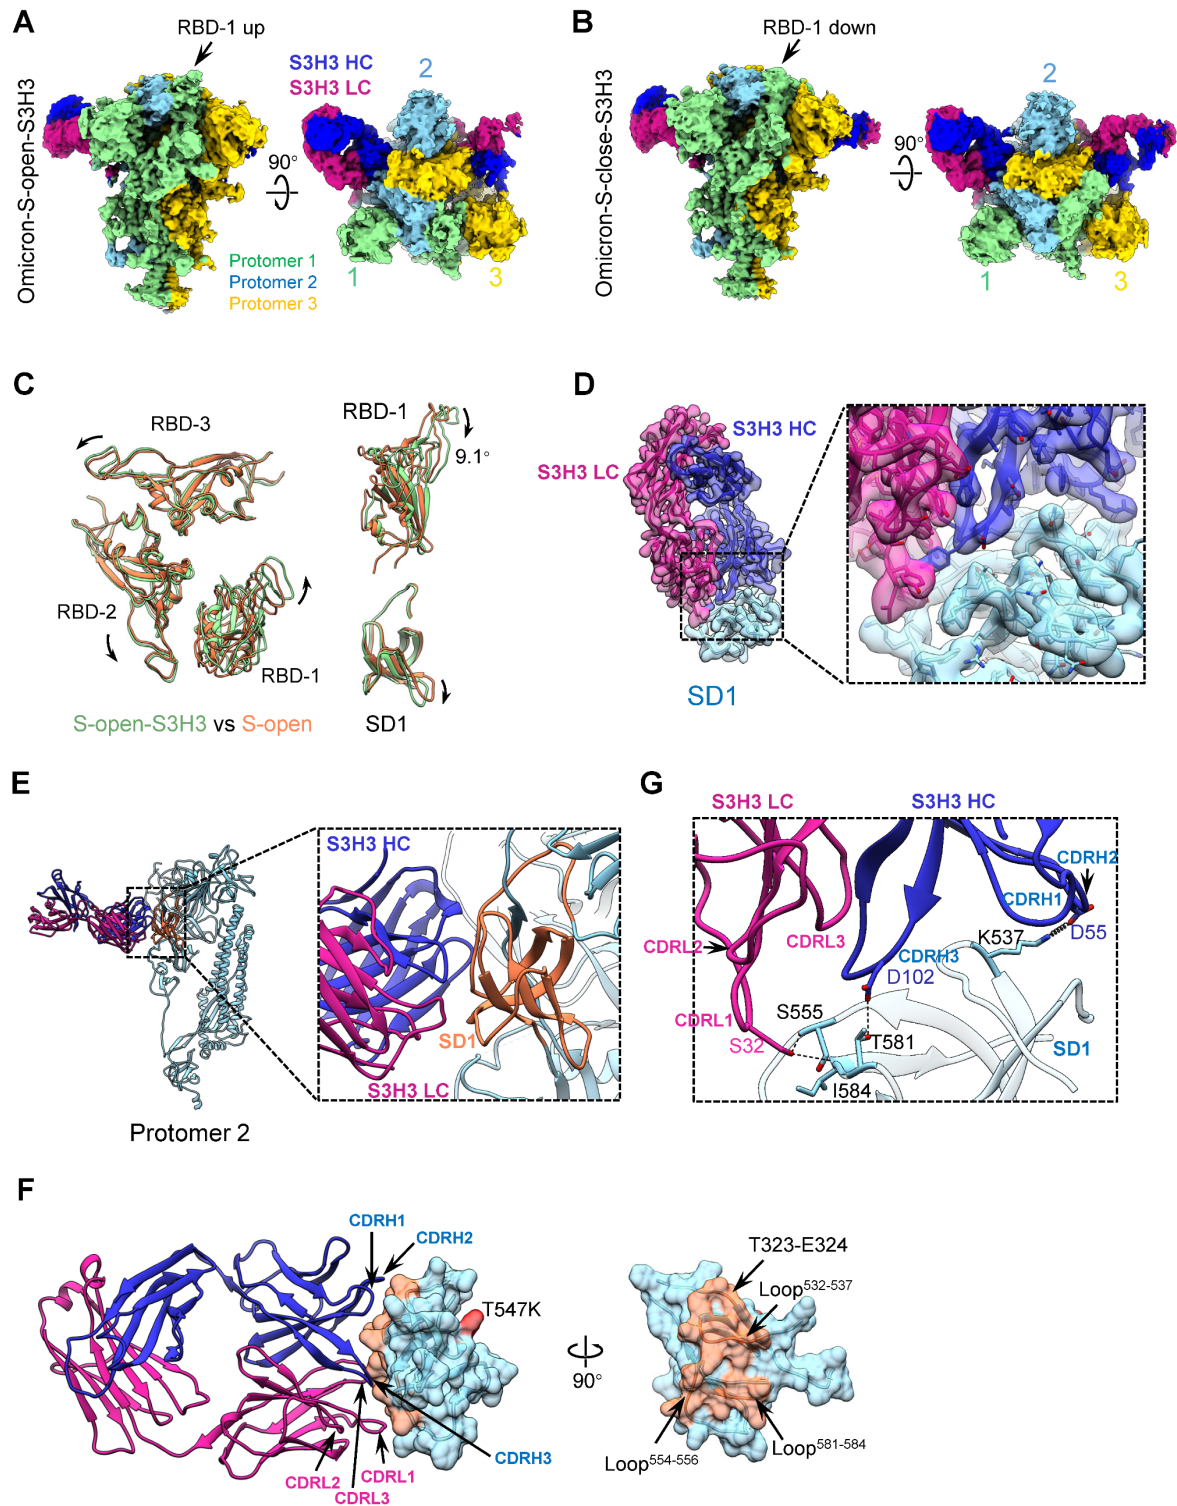

648

649 **Fig. 4 Cryo-EM analyses on the Omicron S-S3H3 Fab complex.** (A-B) Side and top views  
 650 of the cryo-EM map of the Omicron S-open-S3H3 (A) and S-close-S3H3 complex (B), with  
 651 the heavy and light chains of S3H3 Fab in medium blue and violet red, respectively. The color  
 652 scheme was followed. (C) Conformational comparison between Omicron S-open-S-S3H3  
 653 (light green) and Omicron S-open (orange), indicating a slight twist of the RBDs of S-open-  
 654 S3H3 and the downward rotations of RBD-1 (up to 9.1°) and SD1. (D) Model-map fitting of

655 the focus-refined Omicron SD1-S3H3 structure, and the zoomed-in view of the Omicron SD1-  
656 S3H3 interaction interface. The sidechain densities at the interface were well resolved. (E) The  
657 S3H3 binding on SD1 of protomer 2. (F) The interaction involved regions/residues between  
658 S3H3 Fab and SD1 with T547K labeled. (G) The SD1-S3H3 interaction interface analyzed  
659 using PISA, with major involved structural elements labeled (spring represents salt bridge, and  
660 the black dashed line represents H-bond).  
661

662 **Supplemental figures**

**A**

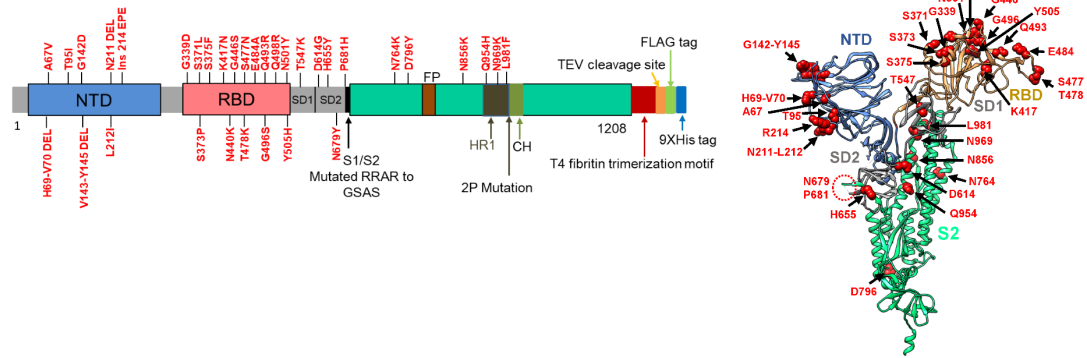

**B**

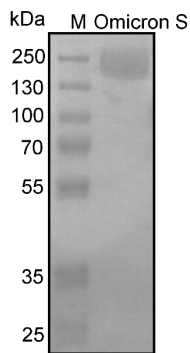

**C**

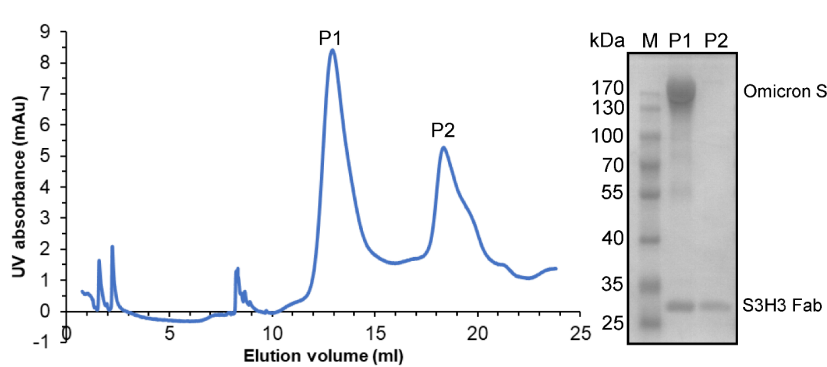

663

664 **Fig. S1 Purification of Omicron variant S and S-S3H3 Fab complex.** (A) Schematic  
665 diagram of the Omicron variant S organization in this study (left, positions of all mutations are  
666 indicated), and the model of a SARS-CoV-2 S protomer (right) with mutation sites of the  
667 Omicron variant shown as red sphere. (B) SDS-PAGE analysis of the purified Omicron variant  
668 S protein. (C) Size-exclusion chromatogram and SDS-PAGE analysis of the formed Omicron  
669 S-S3H3 Fab complex.

670

A

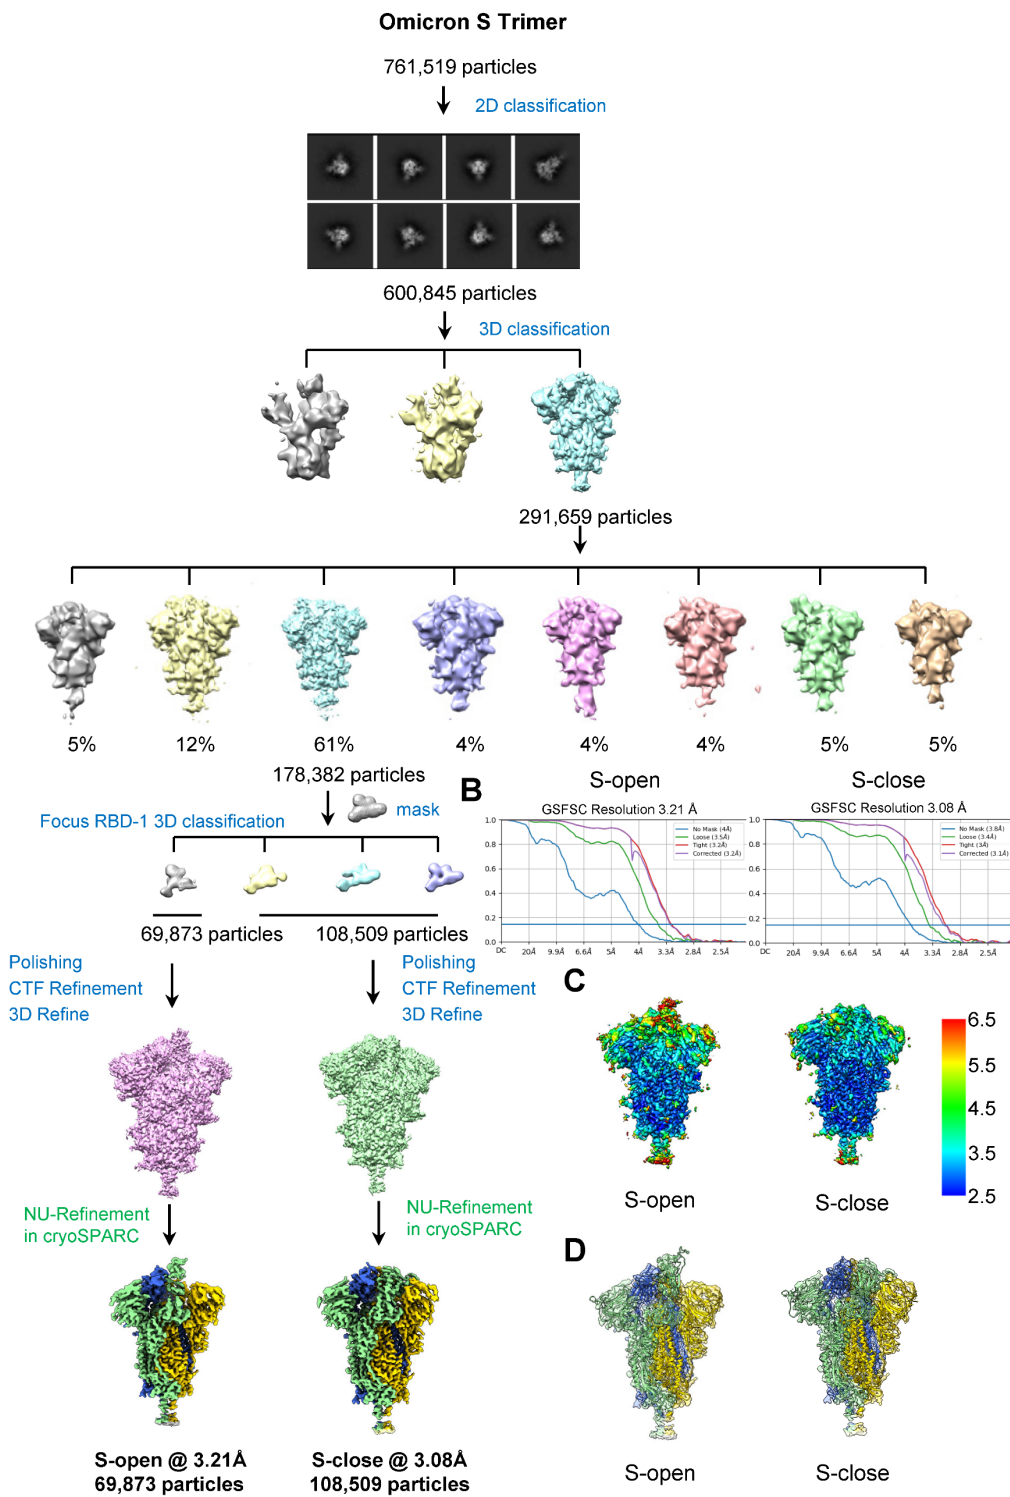

671

672 **Fig. S2 Cryo-EM analysis on the Omicron S trimer.** (A) Data processing workflow for  
 673 structure determination of the Omicron S trimer. The reference-free 2D class averages are also  
 674 presented. (B) Resolution assessment of Omicron S-open and S-close maps by FSC at 0.143  
 675 criterion. (C) Local resolution evaluation of the Omicron S-open and S-close maps. (D) Model-  
 676 map fitting of the Omicron S-open and S-close structures.

### Omicron S-ACE2

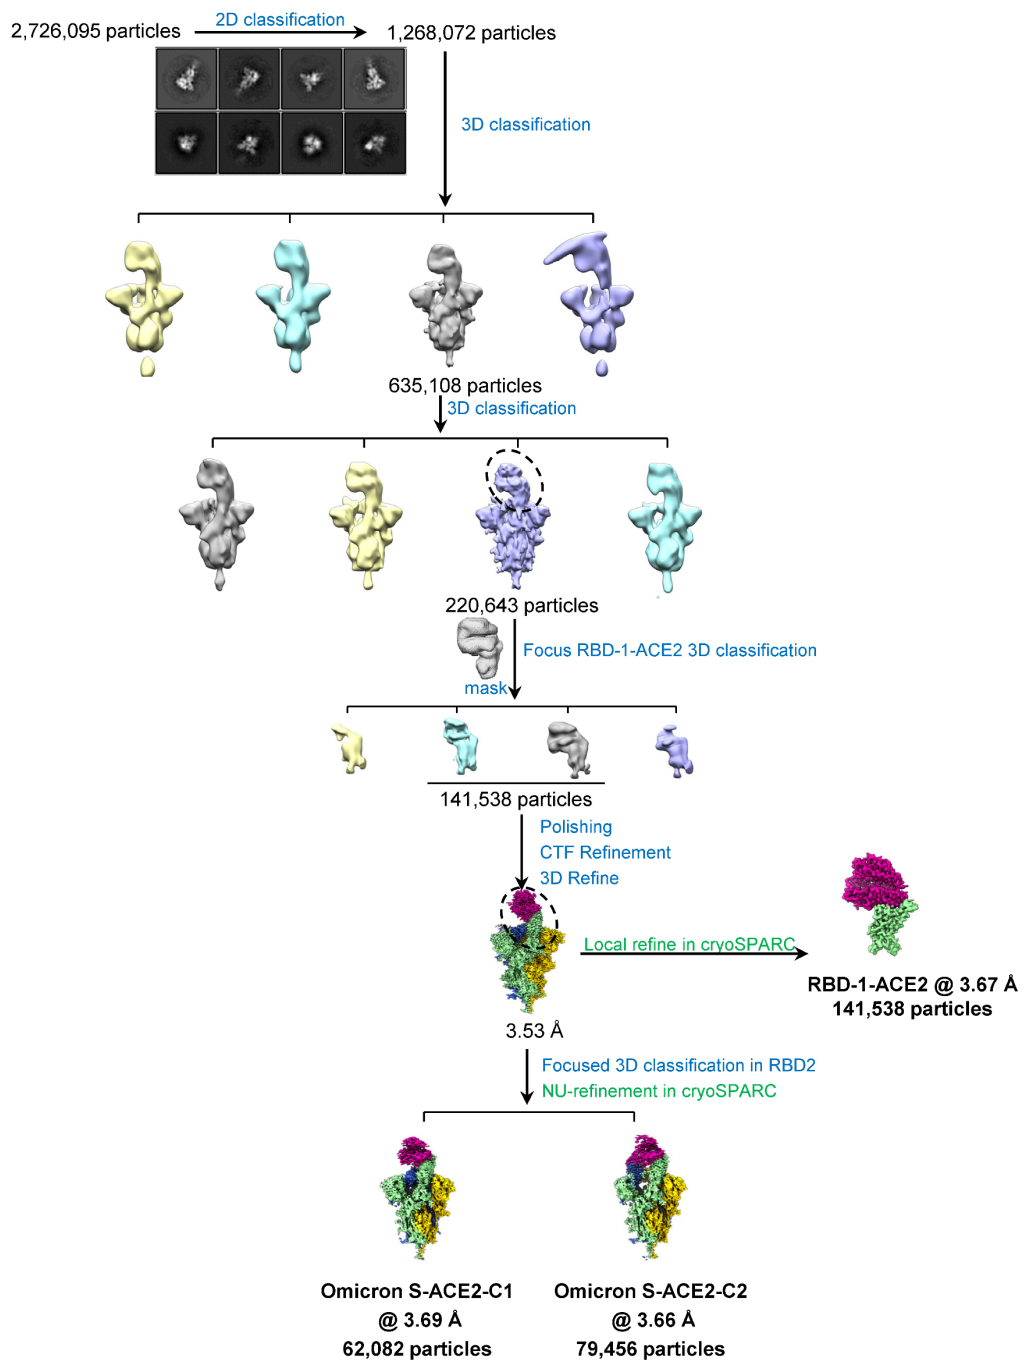

677

678 **Fig. S3 Cryo-EM data processing procedure for the Omicron S-ACE2 complex.**



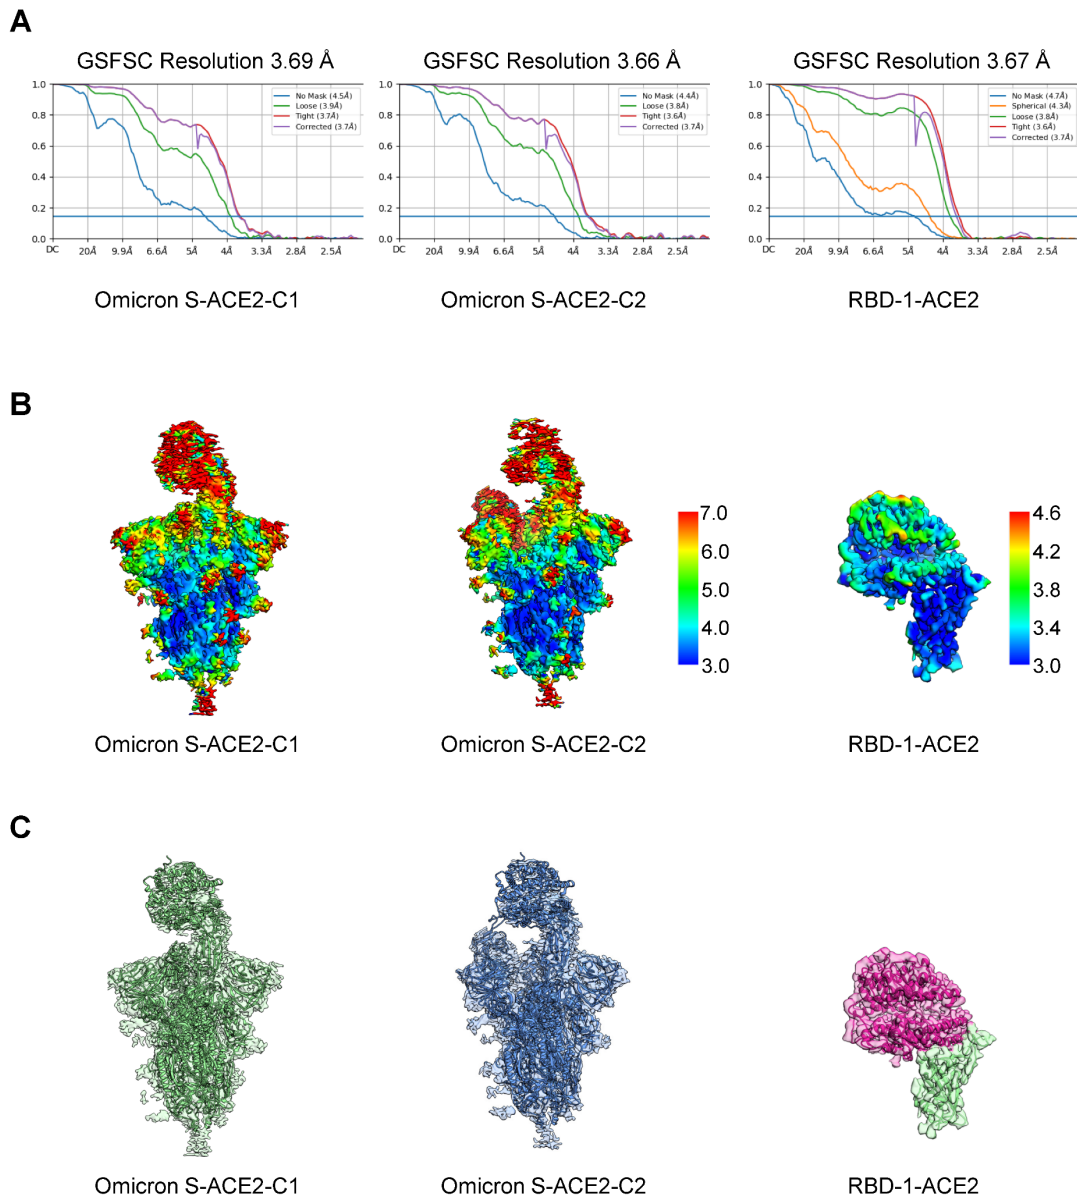

679

680 **Fig. S4 Cryo-EM analysis on the Omicron S-ACE2 complex.** (A) Resolution assessment of  
681 the cryo-EM maps by FSC at 0.143 criterion. (B-C) Local resolution evaluation (B) and Model-  
682 map fitting (C) for the Omicron S-ACE2 complex maps and the RBD-1-ACE2 map.

**A**

**Omicron S-S3H3**

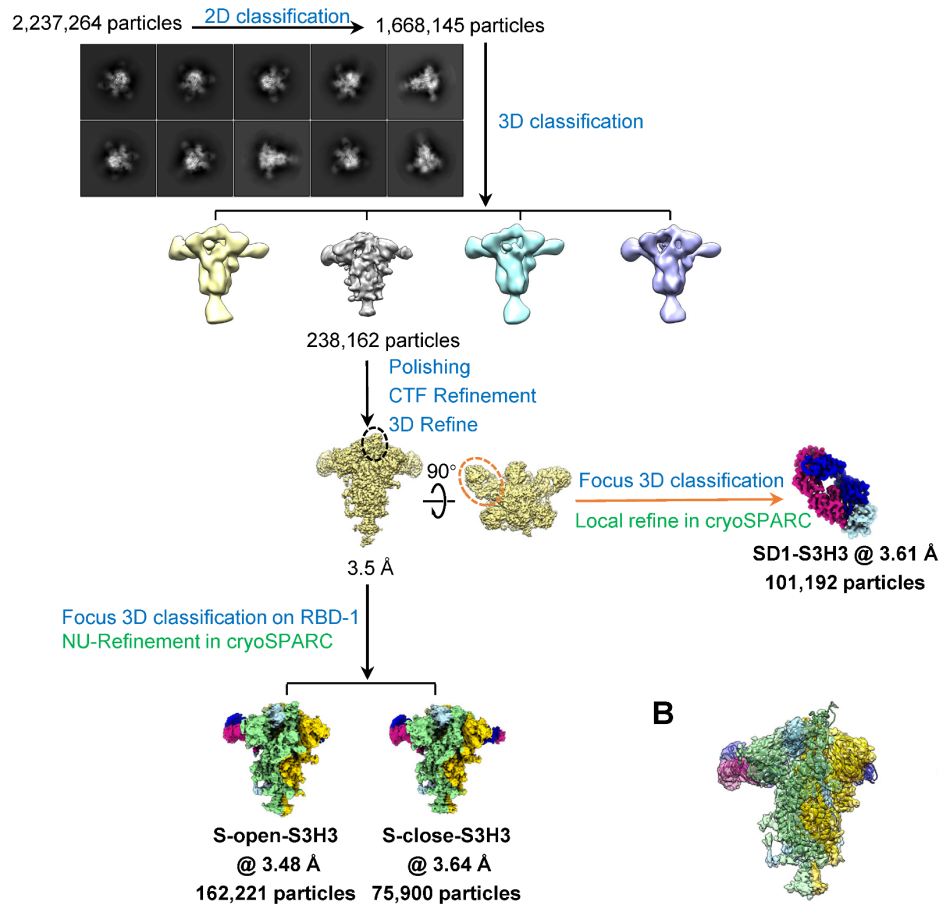

**B**

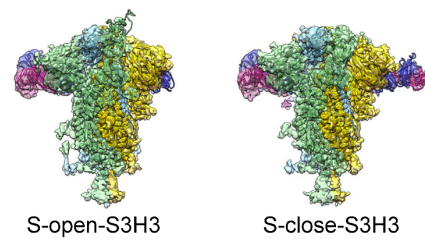

**C**

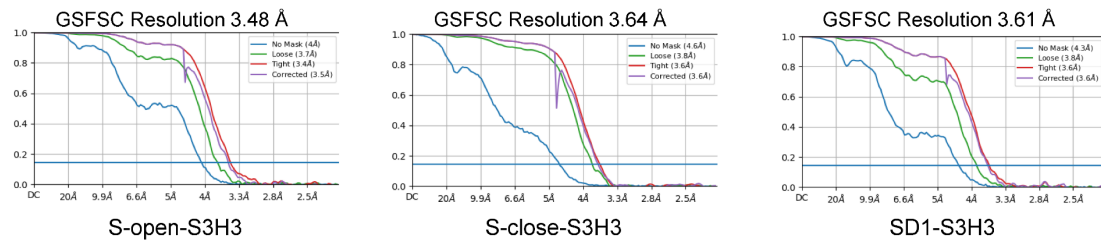

**D**

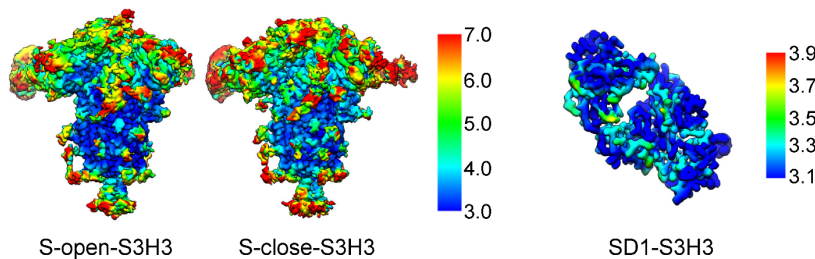

683

684 **Fig. S5 Cryo-EM analysis on the Omicron S-S3H3 Fab complex.** (A) Data processing  
685 workflow for the Omicron S-S3H3 Fab complex. The reference-free 2D class averages are also  
686 presented. (B) Model-map fitting for the Omicron S-S3H3 complex. (C) Resolution assessment

687 of the cryo-EM maps by FSC at 0.143 criterion. (D) Local resolution evaluation of the Omicron  
688 S-S3H3 and SD1-S3H3 maps.

689 **Supplemental tables**

690 **Table S1. Cryo-EM data collection and refinement statistics for Omicron S, Omicron S-**  
 691 **ACE2, and Omicron S-S3H3**

|                                                 | Omicron S               |         | Omicron S-ACE2  |        |            | Omicron S-S3H3  |              |          |
|-------------------------------------------------|-------------------------|---------|-----------------|--------|------------|-----------------|--------------|----------|
| <b>Data collection</b>                          |                         |         |                 |        |            |                 |              |          |
| EM equipment                                    | Titan Krios             |         | Titan Krios     |        |            | Titan Krios     |              |          |
| Voltage (kV)                                    | 300                     |         | 300             |        |            | 300             |              |          |
| Detector                                        | Gatan K3 camera         |         | Gatan K3 camera |        |            | Gatan K3 camera |              |          |
| Pixel size (Å)                                  | 1.093                   |         | 1.093           |        |            | 1.093           |              |          |
| Electron dose (e <sup>-</sup> /Å <sup>2</sup> ) | 50.2                    |         | 50.2            |        |            | 50.2            |              |          |
| Exposure time (s)                               | 3                       |         | 3               |        |            | 3               |              |          |
| Frames                                          | 30                      |         | 30              |        |            | 30              |              |          |
| Defocus range (µm)                              | -0.8 to -2.5            |         | -0.8 to -2.5    |        |            | -0.8 to -2.5    |              |          |
| <b>Reconstruction</b>                           |                         |         |                 |        |            |                 |              |          |
| Softwares                                       | Relion 3.1& cryoSPARC   |         |                 |        |            |                 |              |          |
| Structures                                      | S-open                  | S-close | C1              | C2     | RBD-1-ACE2 | S-open-S3H3     | S-close-S3H3 | SD1-S3H3 |
| Final particles                                 | 69,873                  | 108,509 | 62,082          | 79,456 | 141,538    | 162,221         | 75,900       | 101,192  |
| Symmetry                                        | C1                      | C1      | C1              | C1     | C1         | C1              | C1           | C1       |
| FSC threshold                                   | 0.143                   |         |                 |        |            |                 |              |          |
| Final overall resolution (Å)                    | 3.21                    | 3.08    | 3.69            | 3.66   | 3.67       | 3.48            | 3.64         | 3.61     |
| <b>Atomic modeling</b>                          |                         |         |                 |        |            |                 |              |          |
| Softwares                                       | Rosetta & Phenix & Coot |         |                 |        |            |                 |              |          |
| Rms deviations                                  |                         |         |                 |        |            |                 |              |          |
| Bond length (Å)                                 | 0.0020                  | 0.0020  | 0.0045          | 0.004  | 0.008      | 0.0037          | 0.0036       | 0.0033   |
| Bond Angle (°)                                  | 0.49                    | 0.49    | 1.05            | 1.034  | 1.29       | 0.94            | 0.94         | 0.94     |
| Ramachandran plot (%)                           |                         |         |                 |        |            |                 |              |          |
| Favored                                         | 95.99                   | 95.97   | 96.98           | 96.29  | 94.92      | 96.07           | 97.08        | 95.29    |
| Allowed                                         | 3.98                    | 4.03    | 3.02            | 3.65   | 4.70       | 3.85            | 2.85         | 4.71     |
| Outliers                                        | 0.00                    | 0.00    | 0.00            | 0.05   | 0.38       | 0.08            | 0.00         | 0.00     |
| Molprobity score                                | 1.43                    | 1.46    | 1.40            | 1.74   | 1.66       | 1.70            | 1.67         | 1.72     |
| Clash score                                     | 3.65                    | 3.81    | 4.48            | 9.12   | 5.65       | 7.94            | 7.6          | 7.1      |

692

693 **Table S2. Omicron S-close protomer 1 and protomer 3 interactions**

| S-close protomer 1 |       | S-close protomer 3 |       | Interaction | Distance(Å) |
|--------------------|-------|--------------------|-------|-------------|-------------|
| Residue            | Atom  | Residue            | Atom  |             |             |
| TYR 396            | [OH]  | TYR 200            | [OH]  | H-bond      | 3.51        |
| ASN 417            | [OD1] | ALA 372            | [N]   | H-bond      | 2.52        |
| ARG 765            | [NH2] | THR 302            | [O]   | H-bond      | 3.68        |
| ASN 703            | [N]   | ILE 788            | [O]   | H-bond      | 3.34        |
| ALA 701            | [O]   | GLN 787            | [NE2] | H-bond      | 2.56        |
| ALA 701            | [O]   | ILE 788            | [H]   | H-bond      | 2.46        |
| ALA 668            | [N]   | PRO 863            | [O]   | H-bond      | 3.80        |
| GLY 669            | [N]   | LEU 864            | [O]   | H-bond      | 3.59        |
| ALA 713            | [N]   | GLN 895            | [O]   | H-bond      | 3.37        |
| SER1123            | [OG]  | GLU 918            | [OE2] | H-bond      | 3.63        |
| GLU 702            | [OE2] | LYS 790            | [NZ]  | H-bond      | 2.49        |
| TYR 707            | [OH]  | THR 883            | [OG1] | H-bond      | 2.81        |
| TYR 707            | [OH]  | SER 884            | [OG]  | H-bond      | 2.65        |
| LYS 547            | [O]   | ASN 978            | [ND2] | H-bond      | 3.47        |
| LYS 557            | [NZ]  | SER 45             | [OG]  | H-bond      | 3.61        |
| GLN 965            | [NE2] | SER 758            | [OG]  | H-bond      | 2.44        |
| ARG 408            | [NH2] | PHE 375            | [O]   | H-bond      | 2.31        |
| ARG 408            | [NH2] | THR 376            | [OG1] | H-bond      | 2.57        |
| LYS 969            | [N]   | GLN 755            | [O]   | H-bond      | 3.87        |
| PHE 970            | [N]   | GLN 755            | [O]   | H-bond      | 3.70        |
| ASN 317            | [ND2] | ASP 737            | [OD1] | H-bond      | 3.61        |
| ARG 357            | [NH1] | PRO 230            | [O]   | H-bond      | 3.87        |
| ARG319             | [NH2] | ASP 737            | [OD2] | H-bond      | 3.46        |
| LYS 386            | [NZ]  | PHE 981            | [O]   | H-bond      | 2.95        |
| VAL 1040           | [N]   | GLU 1031           | [OE2] | H-bond      | 3.07        |
| GLU 702            | [OE1] | LYS 790            | [NZ]  | Salt bridge | 3.57        |
| GLU 702            | [OE2] | LYS 790            | [NZ]  | Salt bridge | 2.49        |
| ARG 319            | [NH1] | ASP 737            | [OD2] | Salt bridge | 3.94        |
| ARG 319            | [NH2] | ASP 737            | [OD2] | Salt bridge | 3.46        |

694

695 **Table S3. Omicron S-close protomer 1 and protomer 2 interactions**

| S-close Protomer 1 |       | S-close Protomer 2 |       | Interaction | Distance(Å) |
|--------------------|-------|--------------------|-------|-------------|-------------|
| Residue            | Atom  | Residue            | Atom  |             |             |
| PHE 43             | [O]   | ARG 567            | [N]   | H-bond      | 3.38        |
| TYR 200            | [OH]  | TYR 396            | [OH]  | H-bond      | 3.82        |
| PRO 230            | [O]   | ARG 357            | [NH1] | H-bond      | 3.74        |
| TYR 369            | [OH]  | ASN 460            | [ND2] | H-bond      | 3.21        |
| ASN 370            | [OD1] | TYR 421            | [OH]  | H-bond      | 2.81        |
| PHE 375            | [O]   | ARG 408            | [NH1] | H-bond      | 3.14        |
| PHE 375            | [O]   | ARG 408            | [NH2] | H-bond      | 3.18        |
| ASP 737            | [OD2] | ARG 319            | [NH2] | H-bond      | 3.78        |
| GLN 755            | [O]   | LYS 969            | [N]   | H-bond      | 3.42        |
| GLN 755            | [O]   | SER 968            | [OG]  | H-bond      | 2.21        |
| GLN 755            | [O]   | PHE 970            | [N]   | H-bond      | 3.26        |
| SER 758            | [OG]  | GLN 965            | [NE2] | H-bond      | 2.31        |
| ILE 788            | [O]   | ASN 703            | [N]   | H-bond      | 3.35        |
| PRO 863            | [O]   | ALA 668            | [N]   | H-bond      | 3.14        |
| LEU 864            | [O]   | ALA 668            | [N]   | H-bond      | 3.65        |
| LEU 864            | [O]   | GLY 669            | [N]   | H-bond      | 3.07        |
| SER 884            | [OG]  | TYR 707            | [OH]  | H-bond      | 2.77        |
| LEU 894            | [O]   | TYR 707            | [OH]  | H-bond      | 3.53        |
| GLN 895            | [O]   | ALA 713            | [N]   | H-bond      | 3.53        |
| PHE 981            | [O]   | LYS 386            | [NZ]  | H-bond      | 2.40        |
| ARG 983            | [O]   | SER 383            | [N]   | H-bond      | 3.28        |
| GLU 1031           | [OE2] | VAL 1040           | [N]   | H-bond      | 2.97        |
| LYS 41             | [NZ]  | PHE 562            | [O]   | H-bond      | 3.42        |
| TYR 200            | [OH]  | GLU 516            | [OE2] | H-bond      | 2.33        |
| TYR 369            | [OH]  | ASN 460            | [OD1] | H-bond      | 3.52        |
| GLY 757            | [N]   | SER 968            | [OG]  | H-bond      | 3.86        |
| LYS 764            | [NZ]  | GLN 314            | [OE1] | H-bond      | 2.89        |
| THR 768            | [OG1] | GLN 314            | [OE1] | H-bond      | 3.54        |
| GLN 787            | [NE2] | ALA 701            | [O]   | H-bond      | 2.32        |
| ILE 788            | [N]   | ALA 701            | [O]   | H-bond      | 3.52        |
| LYS 790            | [NZ]  | GLU 702            | [OE2] | H-bond      | 2.69        |
| LYS 856            | [NZ]  | THR 572            | [OG1] | H-bond      | 2.80        |
| TYR 904            | [OH]  | GLY 1093           | [O]   | H-bond      | 2.65        |
| SER 975            | [OG]  | ASP 571            | [OD2] | H-bond      | 2.52        |
| ASN 978            | [ND2] | LYS 547            | [O]   | H-bond      | 3.08        |
| ASP 737            | [OD2] | ARG 319            | [NH2] | Salt bridge | 3.78        |
| LYS 790            | [NZ]  | GLU 702            | [OE1] | Salt bridge | 3.64        |
| LYS 790            | [NZ]  | GLU 702            | [OE2] | Salt bridge | 2.69        |

696

697 **Table S4. Omicron RBD-1-ACE2 structure revealed RBD/ACE2 interactions**

| Omicron S RBD-1 |       | ACE2    |       | Interaction | Distance(Å) |
|-----------------|-------|---------|-------|-------------|-------------|
| Residue         | Atom  | Residue | Atom  |             |             |
| ASN 487         | [OD1] | TYR 83  | [OH]  | H-bond      | 2.45        |
| TYR 489         | [OH]  | TYR 83  | [OH]  | H-bond      | 3.00        |
| SER 494         | [O]   | HIS 34  | [NE2] | H-bond      | 3.09        |
| SER 496         | [O]   | LYS 353 | [NZ]  | H-bond      | 3.65        |
| SER 496         | [OG]  | LYS 353 | [NZ]  | H-bond      | 2.82        |
| ASN 477         | [ND2] | SER 19  | [O]   | H-bond      | 3.86        |
| ASN 477         | [ND2] | SER 19  | [OG]  | H-bond      | 3.38        |
| ASN 487         | [ND2] | GLN 24  | [OE1] | H-bond      | 2.74        |
| ARG 493         | [NH2] | GLU 35  | [OE1] | H-bond      | 3.58        |
| TYR 449         | [OH]  | ASP 38  | [OD1] | H-bond      | 2.79        |
| ARG 498         | [NH1] | ASP 38  | [OD1] | H-bond      | 3.37        |
| TYR 449         | [OH]  | ASP 38  | [OD2] | H-bond      | 2.62        |
| TYR 449         | [OH]  | GLN 42  | [OE1] | H-bond      | 3.27        |
| ARG 498         | [NH1] | GLN 42  | [OE1] | H-bond      | 3.04        |
| HIS 505         | [ND1] | LYS 353 | [O]   | H-bond      | 2.85        |
| THR 500         | [OG1] | ASP 355 | [OD2] | H-bond      | 3.40        |
| ARG 493         | [NH2] | GLU 35  | [OE1] | Salt bridge | 3.58        |
| ARG 493         | [NH2] | GLU 35  | [OE2] | Salt bridge | 3.93        |
| ARG 498         | [NH1] | ASP 38  | [OD1] | Salt bridge | 3.37        |

698

699 **Table S5. Contacting residues (a sidechain distance cut off 4 Å) at the Omicron**  
700 **RBD/ACE2 interface**

| <b>Omicron S RBD-1</b> | <b>ACE2</b>           |
|------------------------|-----------------------|
| Y449                   | D38, Q42              |
| Y453                   | H34                   |
| L455                   | D30                   |
| F456                   | T27, D30, K31         |
| A475                   | Q24, T27              |
| N477                   | S19                   |
| F486                   | M82, Y83              |
| N487                   | Q24, Y83              |
| Y489                   | T27, F28              |
| R493                   | H34, E35              |
| S494                   | H34                   |
| S496                   | D38, K353             |
| R498                   | D38, Y41, Q42         |
| T500                   | Y41, D355, R357       |
| Y501                   | Y41, K353, G354, D355 |
| G502                   | G354                  |
| H505                   | K353, G354            |

701



702 **Table S6. Omicron S SD1-S3H3 structure revealed S/S3H3 interactions**

| Omicron S |       | S3H3    |       | Interaction | Distance(Å) |
|-----------|-------|---------|-------|-------------|-------------|
| Residue   | Atom  | Residue | Atom  |             |             |
| LYS 537   | [NZ]  | ASP 55  | [OD2] | H-bond      | 3.35        |
| THR 581   | [OG1] | ASP 102 | [OD1] | H-bond      | 3.25        |
| SER 555   | [O]   | SER 32  | [OG]  | H-bond      | 3.05        |
| ILE 584   | [O]   | SER 32  | [OG]  | H-bond      | 3.80        |
| LYS 537   | [NZ]  | ASP 55  | [OD2] | Salt bridge | 3.35        |

703

704 Heavy chain

705 Light chain

706

707

708 **Table S7. Contacting residues (a sidechain distance cut off 4 Å) at the Omicron SD1/S3H3**  
709 **interface**

| Omicron S | S3H3          |
|-----------|---------------|
| T323      | S54           |
| E324      | R31           |
| N532      | F32           |
| L533      | Y101          |
| V534      | R31, W33      |
| K535      | Y101          |
| N536      | W33, R59, L98 |
| K537      | H52, D55      |
| E554      | Y36, S95, R96 |
| S555      | A31, S32      |
| N556      | A31, R96      |
| T581      | D102          |
| L582      | Y34           |
| E583      | Y103          |
| I584      | S32           |

710  
711 Heavy chain  
712 Light chain  
713  
714
